# Supplementary material
Source: PubMed Central journal article supplement (PMC6174360)
Supplement: mmc1.pdf [file mmc1.pdf]

**The American Journal of Human Genetics, Volume 103**

**Supplemental Data**

**Genetic Association of Albuminuria**

**with Cardiometabolic Disease and Blood Pressure**

**Mary E. Haas, Krishna G. Aragam, Connor A. Emdin, Alexander G. Bick, International Consortium for Blood Pressure, Gibran Hemani, George Davey Smith, and Sekar Kathiresan**

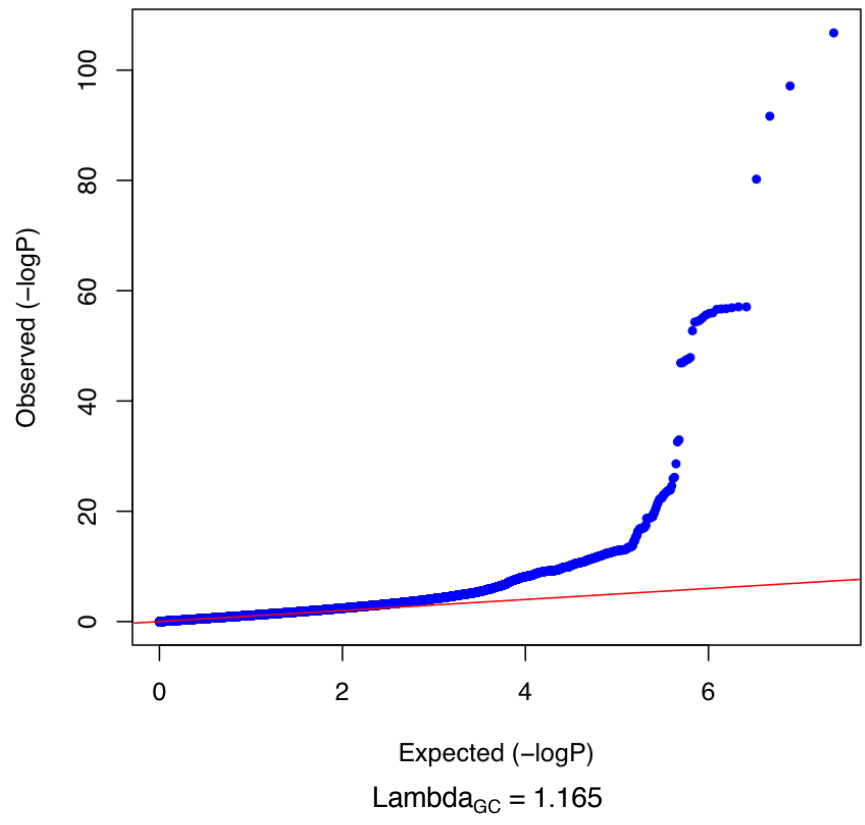

**Figure S1. Genomic inflation in genome-wide association study of albuminuria in UK Biobank.**



## Albuminuria → Systolic Blood Pressure

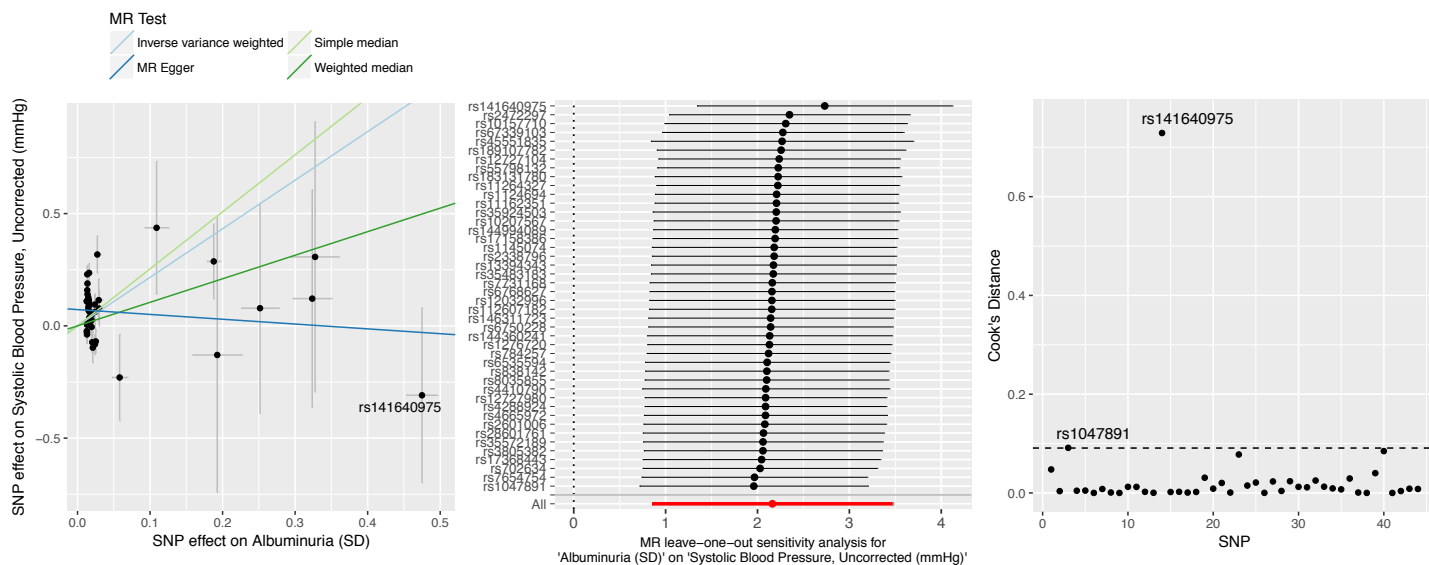

## Albuminuria → Diastolic Blood Pressure

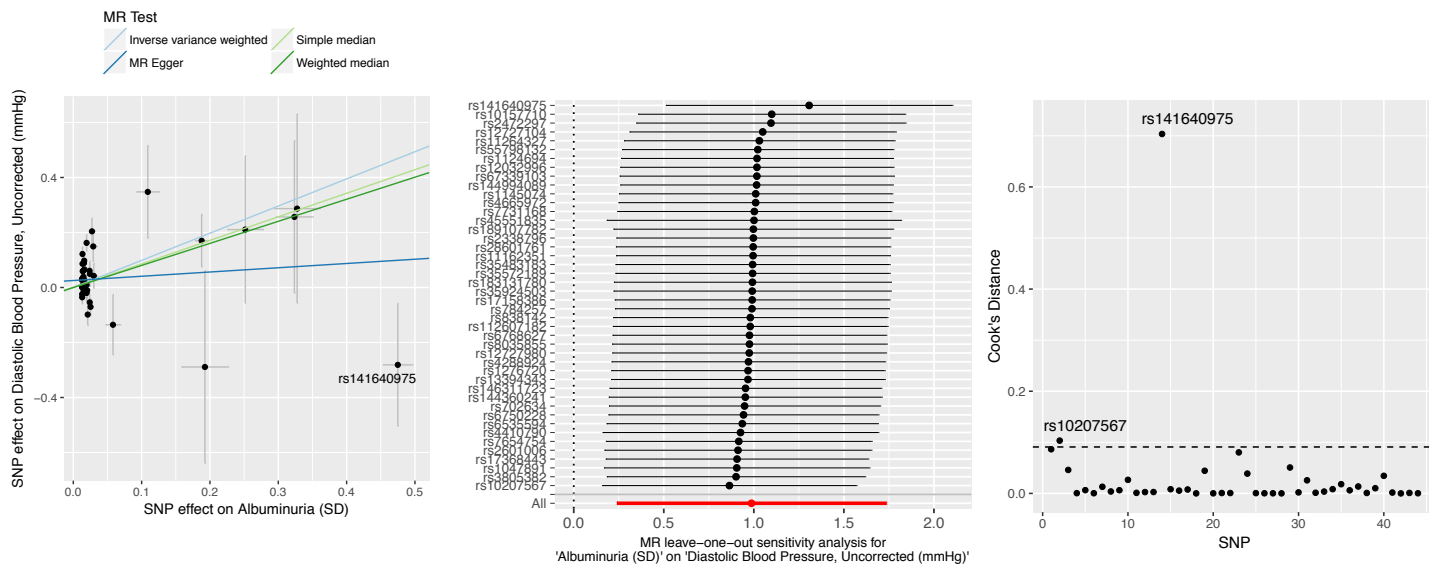

**Figure S3. Sensitivity analyses for Mendelian randomization of 44-SNP albuminuria genetic risk score with blood pressure in UK Biobank (n = 381833).** Neither blood pressure nor albuminuria were corrected for hypertensive medication use. Left, effect of each SNP on albuminuria and blood pressure. Lines indicate trend as analyzed via different Mendelian randomization methods. Middle, Leave-one-out analysis for inverse variance weighted regression. Right, Cook's distance of potential outliers.

## Systolic Blood Pressure → Albuminuria

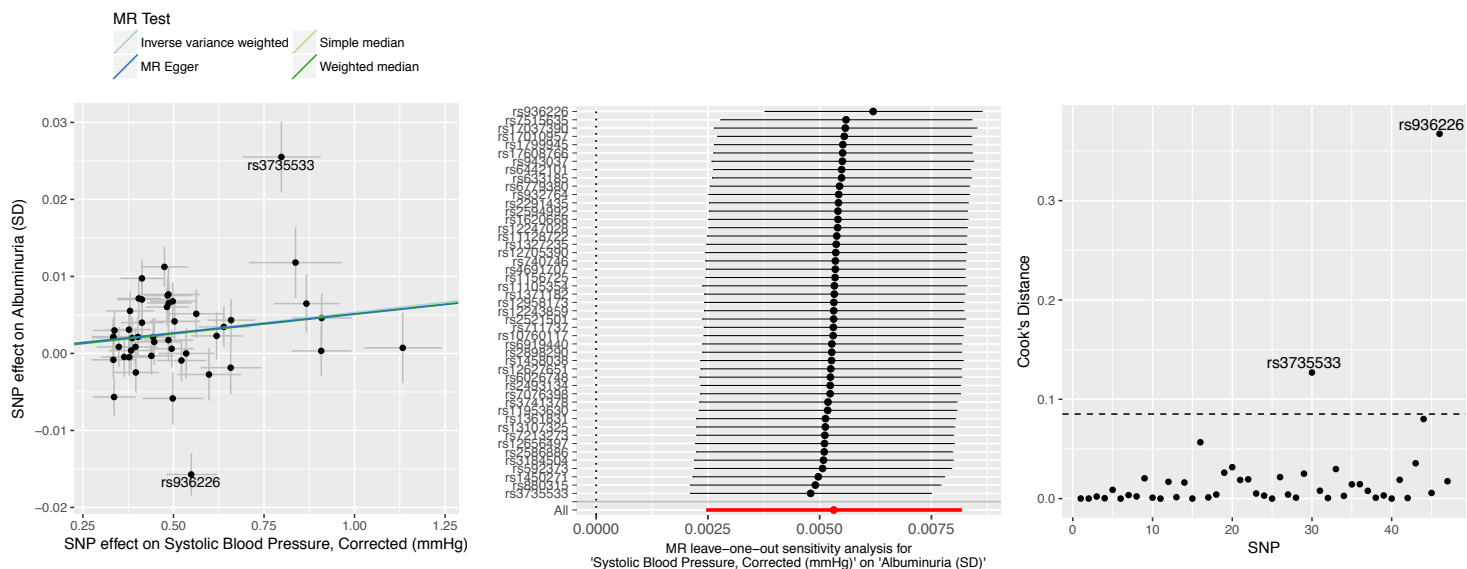

## Diastolic Blood Pressure → Albuminuria

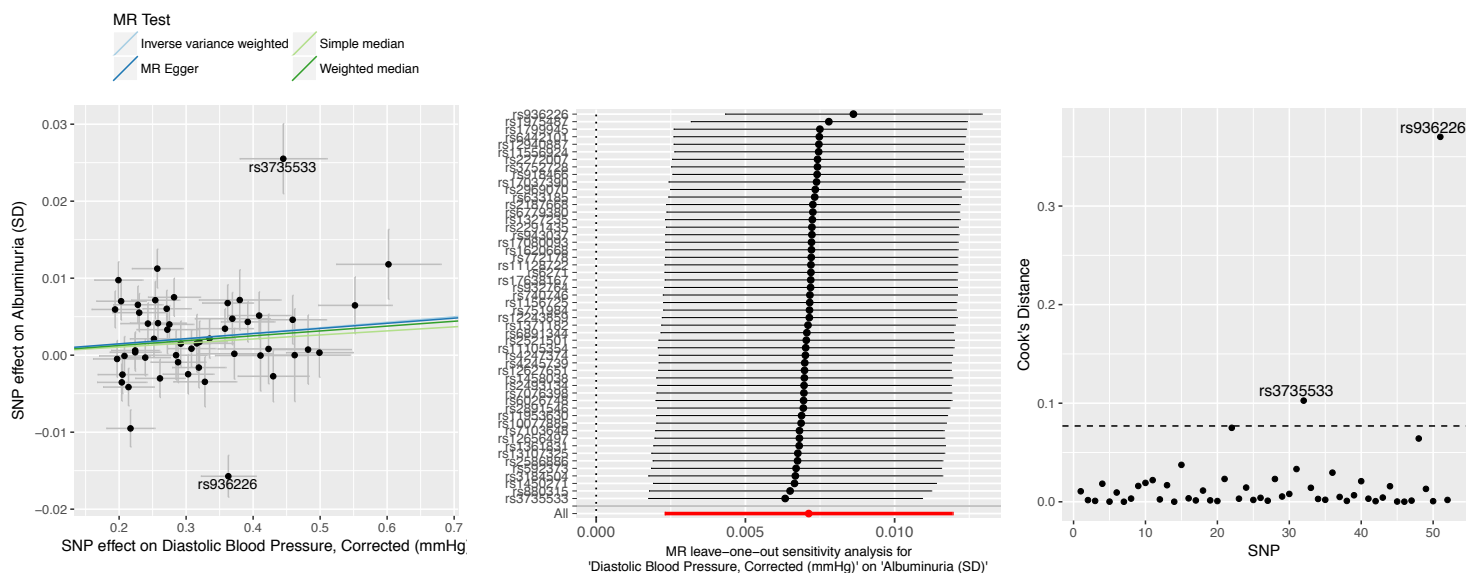

**Figure S4. Sensitivity analyses for Mendelian randomization of blood pressure genetic risk scores from ICBP Cardio-MetaboChip ( $n_{\max} = 201529$ ) with albuminuria in UK Biobank ( $n = 382500$ ).** Blood pressures are corrected for hypertensive medication use and include BMI as covariate. Systolic blood pressure genetic risk score comprised of 47 SNPs, diastolic blood pressure genetic risk score comprised of 52 SNPs. Left, effect of each SNP on albuminuria and blood pressure. Lines indicate trend as analyzed via different Mendelian randomization methods. Middle, Leave-one-out analysis for inverse variance weighted regression. Right, Cook's distance of potential outliers.

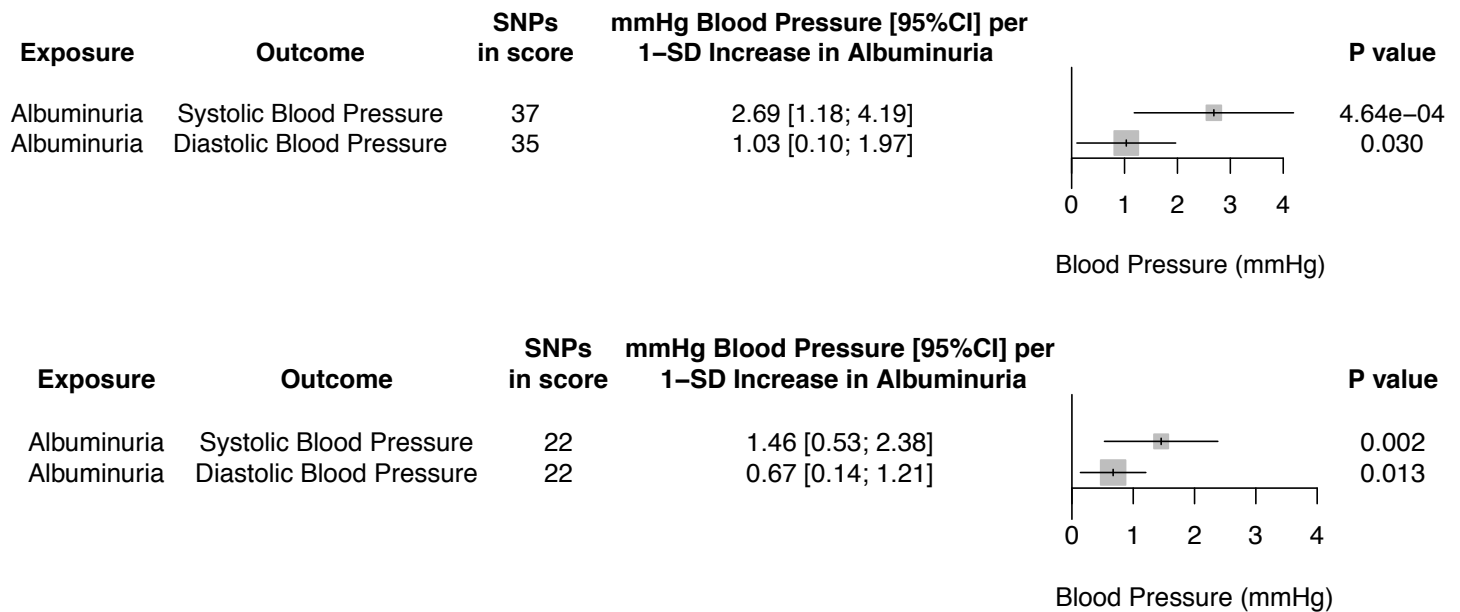

**Figure S5. Additional Mendelian randomization analyses of albuminuria genetic risk score from UK Biobank with blood pressure outcomes.**

SNPs in score, number of albuminuria variants after applying directional MR Steiger filtering to remove variants acting in the incorrect direction. Results are standardized to 1-SD increase in albuminuria due to the genetic risk score. Top, effect of albuminuria genetic risk score from UK Biobank ( $n = 382500$ ) on blood pressure corrected for hypertensive medication use and BMI from ICBP 1000G ( $n_{\max} = 150134$ ) via inverse variance weighted fixed effect meta-analysis. Out of 46 albuminuria score SNPs, 38 were available in ICBP. Two sample Mendelian randomization analysis.

Bottom, Association of albuminuria genetic risk with blood pressure without hypertension medication effects in UK Biobank ( $n = 302687$ ). Two-stage least-squares regression using albuminuria genetic risk score as instrumental variable on blood pressure outcomes in UK Biobank; age + sex + genotyping array + 1<sup>st</sup> 10 PCs as covariates. Individuals taking hypertensive medications were excluded. Bars indicate 95% confidence intervals for effect on blood pressure.

## Albuminuria → Systolic Blood Pressure

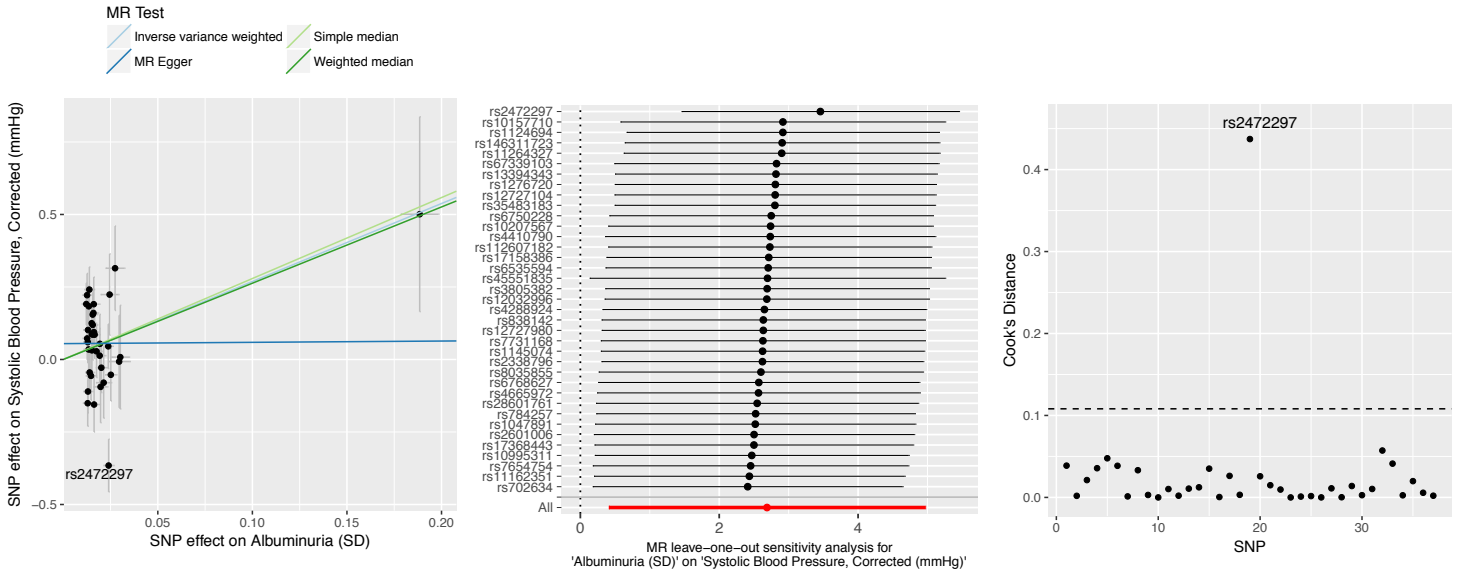

## Albuminuria → Diastolic Blood Pressure

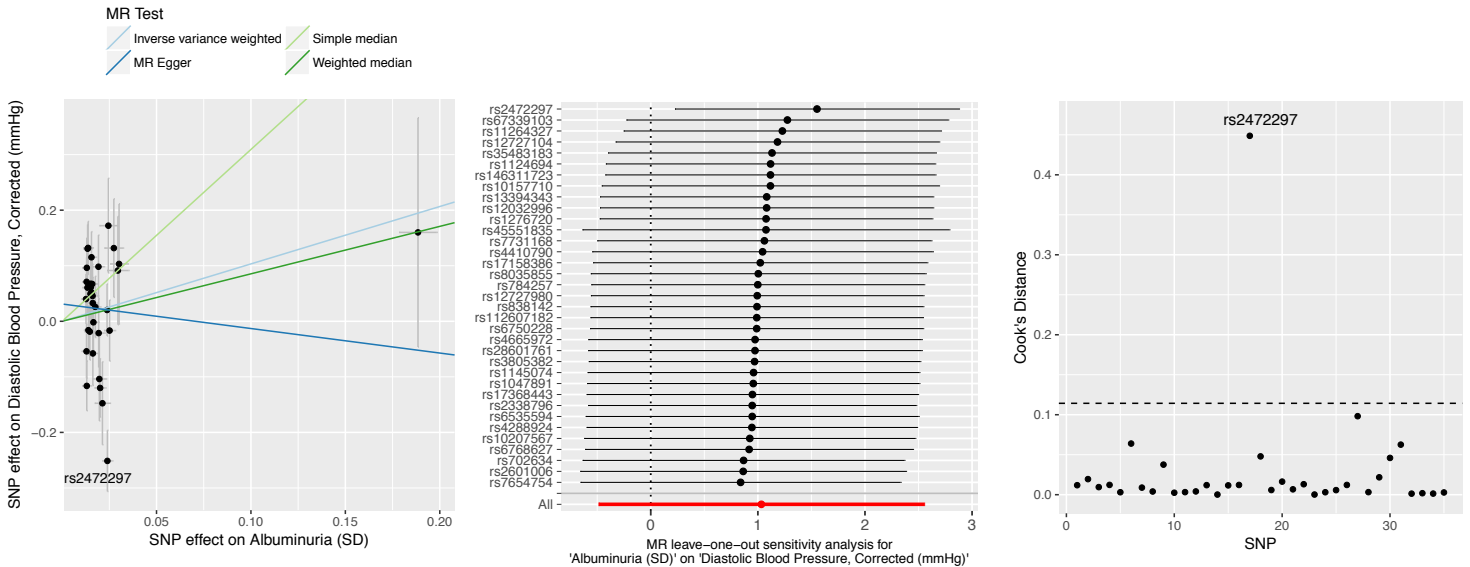

**Figure S6. Sensitivity analyses for Mendelian randomization of albuminuria genetic risk score in UK Biobank ( $n = 382500$ ) with Blood Pressure from ICBP 1000G ( $n_{\max} = 150134$ ).** Blood pressures are corrected for hypertensive medication use and include BMI as covariate. Albuminuria genetic risk score comprised of 37 SNPs for systolic blood pressure outcome and 35 SNPs for diastolic blood pressure outcome. Left, effect of each SNP on albuminuria and blood pressure. Lines indicate trend as analyzed via different Mendelian randomization methods. Middle, Leave-one-out analysis for inverse variance weighted regression. Right, Cook's distance of potential outliers.

## Albuminuria → Systolic Blood Pressure

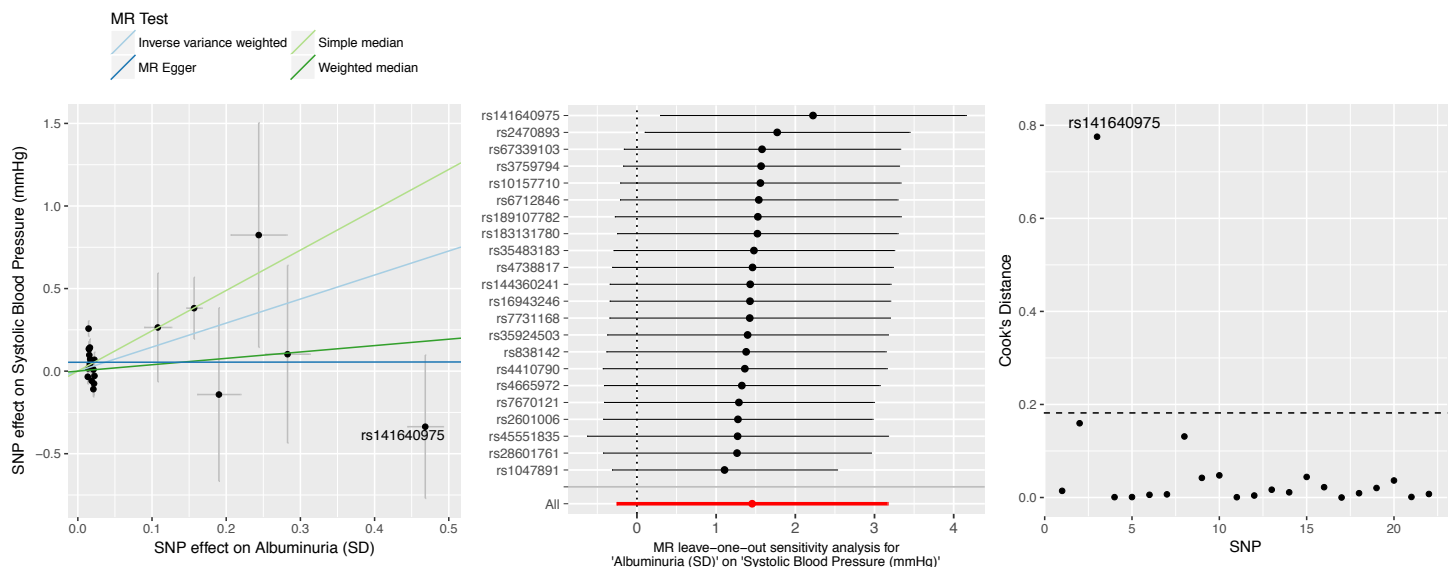

## Albuminuria → Diastolic Blood Pressure

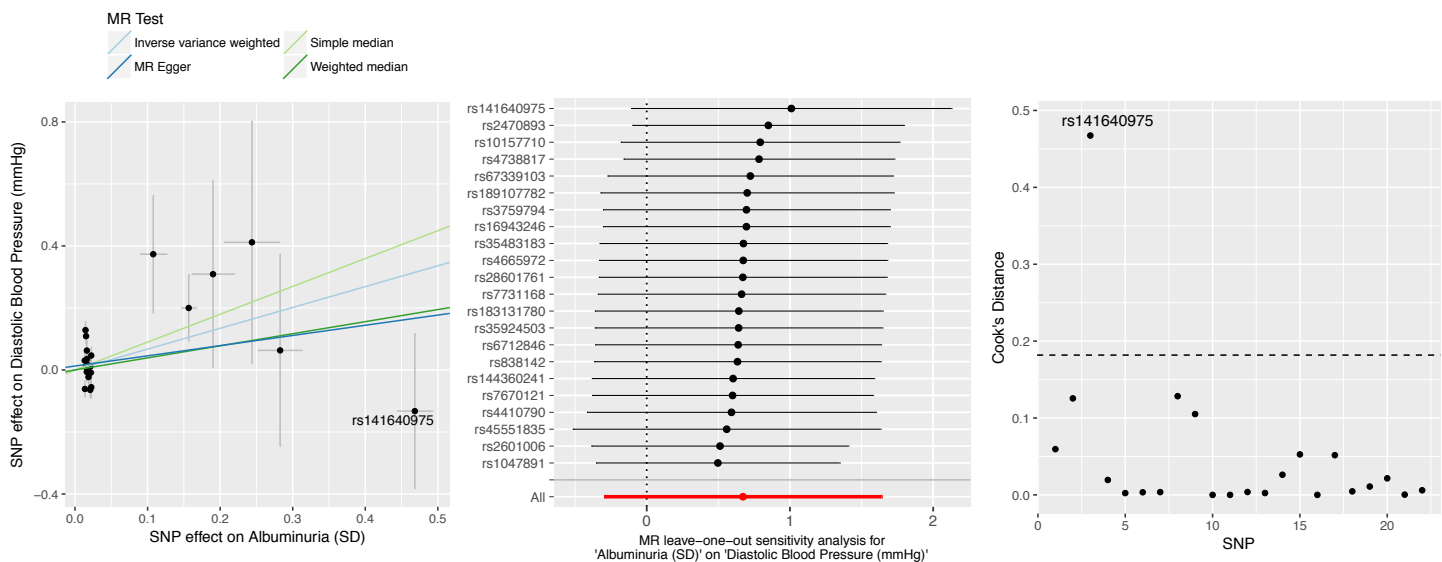

**Figure S7. Sensitivity analyses for Mendelian randomization of 22-SNP albuminuria genetic risk score with blood pressure in UK Biobank (n = 302687).** Individuals with hypertensive medication use were excluded. Left, effect of each SNP on albuminuria and blood pressure. Lines indicate trend as analyzed via different Mendelian randomization methods. Middle, Leave-one-out analysis for inverse variance weighted regression. Right, Cook's distance of potential outliers.



**Table S1. Characteristics of participants in UK Biobank.**

|                                              |                |
|----------------------------------------------|----------------|
| No. Individuals                              | 382500         |
| Age, mean (SD), yrs                          | 56.9 (7.9)     |
| Women, No. (%)                               | 204890 (53.6)  |
| UK BiLEVE array, No. (%)                     | 44806 (11.7)   |
| Blood pressure, mean (SD), mmHg*             |                |
| Systolic                                     | 138.3 (18.6)   |
| Diastolic                                    | 82.3 (10.1)    |
| Body mass index, mean (SD)**                 | 27.4 (4.7)     |
| Current smoker, No. (%)***                   | 39051 (10.2)   |
| Urine albumin/creatinine, median (IQR), mg/g | 9.8 (6.1-16.5) |
| Microalbuminuria, No. (%)                    | 54519 (14.3)   |
| Macroalbuminuria, No. (%)                    | 1495 (0.4)     |
| Coronary Artery Disease, No. (%)             | 32623 (8.5)    |
| Type 2 Diabetes, No. (%)                     | 17619 (4.6)    |
| Hypertension, No. (%)                        | 124345 (32.5)  |
| Chronic Kidney Disease, No. (%)              | 4885 (1.3)     |

\* Baseline blood pressure was averaged from two measurements taken a few moments apart and was unadjusted for hypertensive medication use. Measurements were missing from 667 and 656 individuals for systolic and diastolic blood pressure, respectively.

\*\* Body mass index was calculated in units of kilograms weight divided by height in meters squared. Baseline measurement was missing for 1029 individuals

\*\*\* Excludes 1302 individuals for whom smoking status was not available

**Table S2. Cardiometabolic Disease Definitions**

| <b>Outcome</b>              | <b>Definition</b>                                                                                                                                                                                                                                                                                                                                                                                                                                                                                                                                                                                                                                                                                                                                                                                                                                                                                                                                                                                                                                                                                                                                                                                                          |
|-----------------------------|----------------------------------------------------------------------------------------------------------------------------------------------------------------------------------------------------------------------------------------------------------------------------------------------------------------------------------------------------------------------------------------------------------------------------------------------------------------------------------------------------------------------------------------------------------------------------------------------------------------------------------------------------------------------------------------------------------------------------------------------------------------------------------------------------------------------------------------------------------------------------------------------------------------------------------------------------------------------------------------------------------------------------------------------------------------------------------------------------------------------------------------------------------------------------------------------------------------------------|
| All-cause mortality         | Death certificate provided by NHS Information Centre or NHS Central Register, Scotland                                                                                                                                                                                                                                                                                                                                                                                                                                                                                                                                                                                                                                                                                                                                                                                                                                                                                                                                                                                                                                                                                                                                     |
| Coronary artery disease     | Myocardial infarction (MI), angina, coronary artery bypass grafting, coronary artery angioplasty or triple heart bypass documented in medical history at time of enrollment by a trained nurse or hospitalization for or death due to ICD-10 code for acute or subsequent myocardial infarction (I21, I21.0-21.4, I21.9, I22, I22.0, I22.1, I22.8, I22.9, I23, I23.0-23.6, I23.8) or ischaemic or atherosclerotic heart disease (I24, I24.0, I24.1, I24.8, I24.9, I25.1, I25.2, I25.5, I25.6, I25.8, I25.9) or angina (I20, I20.0, I20.1, I20.8, I20.9) or<br>Hospitalization for ICD-9 code due to myocardial infarction, ischaemic heart disease, angina, or coronary atherosclerosis (410, 4109, 411, 4119, 412, 4129, 413, 4139, 4140, 4148, 4149) or Hospitalization for OPCS-4 coded procedure: coronary artery bypass grafting (K40, K40.1-K40.4, K40.8, K40.9, K41, K41.1-41.4, K41.8, K41.9, K42, K42.1-K42.4, K42.8, K42.9, K43, K43.1-43.4, K43.8, K43.9, K44, K44.1, K44.2, K44.8, K44.9, K45.1-45.6, K45.8, K45.9, K46, K46.1-46.5, K46.8, K46.9) or<br>Hospitalization for OPCS-4 coded procedure: coronary angioplasty ± stenting (K49.1-49.4, K49.8, K49.9, K50.1, K50.2, K50.4, K75.1-75.4, K75.8, K75.9) |
| Stroke                      | History of stroke, adjudicated centrally by UK Biobank as self-report of stroke during verbal interview with trained nurse or hospitalization for or death due to ICD-10 code I60-64 or ICD-9 code (430, 431, 434, 436) ( <i>df-42007</i> , <a href="http://biobank.ctsu.ox.ac.uk/crystal/refer.cgi?id=462">http://biobank.ctsu.ox.ac.uk/crystal/refer.cgi?id=462</a> )                                                                                                                                                                                                                                                                                                                                                                                                                                                                                                                                                                                                                                                                                                                                                                                                                                                    |
| Peripheral vascular disease | Self-reported history of peripheral vascular disease, arterial embolism, intermittent claudication, leg artery bypass, leg artery angioplasty, or leg amputation during verbal interview with trained nurse or<br>Hospitalization for or death due to ICD-10 code for atherosclerosis of (non-coronary) arteries or peripheral vascular disease (I70.0, I70.00, I70.01, I70.2, I70.20, I70.21, I70.8, I70.80, I70.9, I70.90, I73.8 or I73.9) or<br>Hospitalization for ICD-9 code due to atherosclerosis of arteries or peripheral vascular disease (4400, 4402, 4438, 4439) or<br>Hospitalization for OPCS-4 coded procedure for leg amputation, or leg artery procedure such as bypass, stent or angioplasty (X09.3-09.5, L21.6, L51.3, L51.6, L51.8, L52.1, L52.2, L54.1, L54.4, L54.8, L59.1-L59.8, L60.1, L60.2, L63.1, L63.5, L63.9, L66.7)                                                                                                                                                                                                                                                                                                                                                                          |
| Heart failure               | Self-reported history of heart failure or cardiomyopathy during verbal interview with trained nurse or<br>Hospitalization for or death due to ICD-10 code for hypertensive heart disease, cardiomyopathy or heart failure (I11.0, I13.0, I13.2, I25.5, I42.0, I42.5, I42.8, I42.9, I50, I50.0, I50.1, I50.9) or<br>Hospitalization for ICD-9 code due to heart failure or other primary cardiomyopathies (4254, 4280, 4281, 4289)<br>Note: Individuals with history of hypertrophic cardiomyopathy during verbal interview with trained nurse, or hospitalization for or death due to ICD-10 code for hypertrophic cardiomyopathy (I42.1, I42.2) were excluded from both case and control status                                                                                                                                                                                                                                                                                                                                                                                                                                                                                                                           |
| Type 2 diabetes             | Self-reported history of type 2 diabetes during verbal interview with trained nurse or<br>Hospitalization for or death due to ICD-10 code for non-insulin-dependent diabetes mellitus (E11, E11.0-11.9)                                                                                                                                                                                                                                                                                                                                                                                                                                                                                                                                                                                                                                                                                                                                                                                                                                                                                                                                                                                                                    |
| Chronic kidney disease      | Self-reported history of kidney failure ± dialysis, kidney nephropathy, IgA nephropathy, diabetic nephropathy or kidney transplant during verbal interview with trained nurse or<br>Hospitalization for or death due to ICD-10 code for hypertensive renal disease, chronic renal failure, end stage renal failure or chronic kidney disease (I12.0, I13.1, I13.2, N18, N18.0-18.5, N18.8, N18.9) or<br>Hospitalization for ICD-9 code due to chronic renal failure (585, 5859) or<br>Hospitalization for OPCS-4 coded procedure for kidney transplantation (M01, M01.1-01.5, M01.8, M01.9)                                                                                                                                                                                                                                                                                                                                                                                                                                                                                                                                                                                                                                |
| Hypertension                | Self-reported history of hypertension, essential hypertension or high blood pressure during verbal interview with trained nurse or<br>Hospitalization for or death due to ICD-10 code for essential hypertension, hypertensive heart disease, hypertensive renal disease, secondary hypertension or renovascular hypertension (I10, I11, I11.0, I11.9, I12, I12.0, I12.9, I13, I13.0-13.2, I15, I15.0-15.2, I15.8, I15.9) or<br>Hospitalization for ICD-9 code due to essential hypertension, hypertensive heart disease, hypertensive renal disease, or secondary hypertension (403, 4030, 4031, 4039, 404, 4040, 4041, 405, 4050, 4051, 4059)                                                                                                                                                                                                                                                                                                                                                                                                                                                                                                                                                                            |

|                         |                                                                                                                                                                                                                                                                                                                                                                                                                                                                                                                                                                                                                                                                                                                                                                                               |
|-------------------------|-----------------------------------------------------------------------------------------------------------------------------------------------------------------------------------------------------------------------------------------------------------------------------------------------------------------------------------------------------------------------------------------------------------------------------------------------------------------------------------------------------------------------------------------------------------------------------------------------------------------------------------------------------------------------------------------------------------------------------------------------------------------------------------------------|
| Skin cancer             | Self-reported history of skin cancer, malignant melanoma, non-melanoma skin cancer, basal cell carcinoma or squamous cell carcinoma during verbal interview with trained nurse or<br>Hospitalization for or death due to ICD-10 code for malignant melanoma, skin, or malignant neoplasm of skin (C43, C43.2-43.7, C43.9, C44, C44.0-44.9) or<br>Hospitalization for ICD-9 code due to malignant melanoma or malignant neoplasm of skin (172, 1727, 173, 1733, 1735, 1739)                                                                                                                                                                                                                                                                                                                    |
| Baseline diabetes       | Self-reported history of diabetes, gestational diabetes, type 1 diabetes, or type 2 diabetes, insulin medication use, or began insulin within one year of diabetes diagnosis during verbal interview with trained nurse or<br>Hospitalization for or death due to ICD-10 code for insulin-dependent diabetes, non-insulin-dependent diabetes mellitus, malnutrition-related diabetes or other diabetes (E10, E10.0-10.9, E11, E11.0-11.9, E12, E12.1, E12.8, E12.9, E13, E13.1-13.3, E13.5-13.9, E14, E14.0-14.9) or<br>Hospitalization for ICD-9 code due to diabetes mellitus with mention with complication, diabetes with ketoacidosis or renal, ophthalmic or neurological manifestations or unspecified complications (2500, 25000, 25001, 25009, 2501, 25011, 25019, 250302505, 25099) |
| Baseline hyperlipidemia | Self-reported history of high cholesterol during verbal interview with trained nurse or<br>Hospitalization for or death due to ICD-10 code for hypercholesterolaemia, hyperglyceridaemia, or hyperlipidaemia (E78.0-E78.2, E78.4, E78.5)                                                                                                                                                                                                                                                                                                                                                                                                                                                                                                                                                      |

Data fields used in definitions: self-report, df-20002, df-20004, df-6150, df-2986, df-6153, df-6177; ICD9, df-41203, df-41205; ICD10, df-41202, df-41204, df-40001, df-40002; OPCS-4 procedures, df-41200, df-41210; death registry, df-40001, df-40002.

**Table S3. Comparison of lead albuminuria SNPs in UK Biobank and CKDGen<sup>a</sup>**

| Lead SNP in UK Biobank                                                           | Proxy SNP in CKDGen | R <sup>2</sup> with Proxy | Effect Allele | Noneffect Allele | EAF                                   | Beta (log(mg/g)) | SE (log(mg/g)) | P value  | EAF                               | Beta (log(mg/g)) | SE (log(mg/g)) | P value         | N     | Direction, UKB & CKDGen |
|----------------------------------------------------------------------------------|---------------------|---------------------------|---------------|------------------|---------------------------------------|------------------|----------------|----------|-----------------------------------|------------------|----------------|-----------------|-------|-------------------------|
| <b>Comparison of lead albuminuria SNPs in UK Biobank with CKDGen<sup>b</sup></b> |                     |                           |               |                  |                                       |                  |                |          |                                   |                  |                |                 |       |                         |
|                                                                                  |                     |                           |               |                  | <b>Lead SNP Effect in UK Biobank</b>  |                  |                |          | <b>Lead SNP Effect in CKDGen</b>  |                  |                |                 |       |                         |
| rs10157710                                                                       |                     |                           | T             | C                | 0.802                                 | 0.019            | 0.0021         | 9.69E-20 | 0.695                             | 0.015            | 0.0074         | <b>0.045</b>    | 54449 | same                    |
| rs12032996                                                                       |                     |                           | G             | A                | 0.838                                 | 0.015            | 0.0023         | 9.33E-11 | 0.850                             | 0.01             | 0.0084         | 0.220           | 54450 | same                    |
| rs1276720                                                                        |                     |                           | T             | C                | 0.745                                 | 0.011            | 0.0019         | 8.98E-09 | 0.783                             | 0.007            | 0.0076         | 0.360           | 53465 | same                    |
| rs17158386                                                                       |                     |                           | A             | G                | 0.262                                 | 0.013            | 0.0019         | 3.65E-12 | 0.215                             | 0.02             | 0.0093         | <b>0.029</b>    | 53465 | same                    |
| rs2023844                                                                        |                     |                           | A             | G                | 0.926                                 | 0.019            | 0.0032         | 1.18E-09 | 0.945                             | 0.036            | 0.014          | <b>0.009</b>    | 54450 | same                    |
| rs2472297                                                                        |                     |                           | T             | C                | 0.267                                 | 0.018            | 0.0019         | 5.31E-22 | 0.248                             | 0.002            | 0.009          | 0.830           | 54450 | same                    |
| rs2601006                                                                        |                     |                           | C             | T                | 0.657                                 | 0.012            | 0.0018         | 2.13E-11 | 0.637                             | -0.0012          | 0.0068         | 0.850           | 54448 | opposite                |
| rs4410790                                                                        |                     |                           | C             | T                | 0.634                                 | 0.018            | 0.0017         | 2.63E-25 | 0.580                             | 0.0012           | 0.0072         | 0.860           | 54450 | same                    |
| rs6535594                                                                        |                     |                           | A             | G                | 0.496                                 | 0.011            | 0.0017         | 7.12E-12 | 0.487                             | 0.018            | 0.0065         | <b>0.006</b>    | 54390 | same                    |
| rs702634                                                                         |                     |                           | A             | G                | 0.692                                 | 0.010            | 0.0018         | 8.03E-09 | 0.708                             | 0.0053           | 0.0063         | 0.400           | 54415 | same                    |
| rs7654754                                                                        |                     |                           | G             | A                | 0.462                                 | 0.010            | 0.0017         | 9.96E-10 | 0.478                             | 0.012            | 0.006          | <b>0.043</b>    | 54382 | same                    |
| rs8035855                                                                        |                     |                           | A             | G                | 0.644                                 | 0.012            | 0.0017         | 1.91E-12 | 0.694                             | 0.0031           | 0.0066         | 0.640           | 54448 | same                    |
|                                                                                  |                     |                           |               |                  | <b>Proxy SNP Effect in UK Biobank</b> |                  |                |          | <b>Proxy SNP Effect in CKDGen</b> |                  |                |                 |       |                         |
| rs10207567                                                                       | rs1971819           | 0.999                     | C             | G                | 0.813                                 | 0.014            | 0.0021         | 1.44E-11 | 0.800                             | 0.015            | 0.0076         | 0.052           | 53368 | same                    |
| rs1047891                                                                        | rs715               | 0.939                     | T             | C                | 0.688                                 | 0.011            | 0.0018         | 1.02E-09 | 0.708                             | 0.012            | 0.0085         | 0.170           | 43892 | same                    |
| rs4665972                                                                        | rs1260326           | 0.93                      | T             | C                | 0.393                                 | 0.011            | 0.0017         | 3.12E-11 | 0.420                             | 0.022            | 0.006          | <b>2.70E-04</b> | 54441 | same                    |
| rs13394343                                                                       | rs17026396          | 1                         | T             | C                | 0.570                                 | 0.011            | 0.0017         | 4.15E-10 | 0.553                             | 0.0053           | 0.006          | 0.380           | 54441 | same                    |
| rs13394343                                                                       | rs2044474           | 1                         | G             | A                | 0.570                                 | 0.011            | 0.0017         | 4.16E-10 | 0.515                             | 0.0051           | 0.006          | 0.400           | 54440 | same                    |
| rs13394343                                                                       | rs6547620           | 1                         | C             | T                | 0.570                                 | 0.011            | 0.0017         | 3.97E-10 | 0.537                             | 0.0044           | 0.0059         | 0.460           | 54439 | same                    |
| rs13394343                                                                       | rs6739015           | 1                         | A             | G                | 0.570                                 | 0.011            | 0.0017         | 3.96E-10 | 0.558                             | 0.0052           | 0.0059         | 0.380           | 54441 | same                    |
| rs7731168                                                                        | rs11960938          | 0.962                     | A             | G                | 0.236                                 | 0.012            | 0.0020         | 1.06E-09 | 0.250                             | -0.0068          | 0.0075         | 0.370           | 53378 | opposite                |
| rs67339103                                                                       | rs7915302           | 0.955                     | C             | T                | 0.219                                 | 0.015            | 0.0020         | 2.39E-13 | 0.230                             | 0.0044           | 0.0074         | 0.550           | 54450 | same                    |
| rs17368443                                                                       | rs17295800          | 0.996                     | C             | T                | 0.061                                 | 0.020            | 0.0035         | 6.40E-09 | 0.062                             | 0.015            | 0.013          | 0.250           | 54450 | same                    |
| rs17368443                                                                       | rs2920154           | 0.996                     | C             | T                | 0.061                                 | 0.020            | 0.0035         | 4.98E-09 | 0.071                             | 0.022            | 0.014          | 0.110           | 53465 | same                    |
| rs4288924                                                                        | rs10873217          | 0.999                     | G             | A                | 0.480                                 | 0.010            | 0.0017         | 6.48E-09 | 0.504                             | 0.0079           | 0.006          | 0.190           | 54399 | same                    |
| rs1145074                                                                        | rs1153849           | 0.997                     | G             | A                | 0.745                                 | 0.011            | 0.0019         | 3.58E-09 | 0.790                             | 0.01             | 0.0066         | 0.130           | 54450 | same                    |
| rs1145074                                                                        | rs1346266           | 0.997                     | G             | T                | 0.745                                 | 0.011            | 0.0019         | 3.53E-09 | 0.797                             | 0.0073           | 0.0072         | 0.310           | 44877 | same                    |
| rs838142                                                                         | rs4021              | 0.995                     | A             | G                | 0.723                                 | 0.012            | 0.0019         | 6.25E-10 | 0.761                             | 0.025            | 0.0086         | <b>0.004</b>    | 53465 | same                    |

**Comparison of lead albuminuria SNP in CKDGen with UK Biobank**

|            |                         |       |   |   |                                       |       |       |          |                                   |       |       |                 |       |      |
|------------|-------------------------|-------|---|---|---------------------------------------|-------|-------|----------|-----------------------------------|-------|-------|-----------------|-------|------|
|            |                         |       |   |   | <b>Proxy SNP Effect in UK Biobank</b> |       |       |          | <b>Proxy SNP Effect in CKDGen</b> |       |       |                 |       |      |
| rs45551835 | rs10795433 <sup>c</sup> | 0.067 | C | A | 0.152                                 | 0.024 | 0.002 | 1.37E-24 | 0.125                             | 0.061 | 0.010 | <b>1.80E-10</b> | 54450 | same |

EAF, Effect Allele Frequency

<sup>a</sup> Effects on albuminuria were calculated in up to 54450 individuals in the CKDGen study (Teumer *et al* 2016. Diabetes. PMID 26631737).

<sup>b</sup> For proxy SNPs, SNPs with largest R<sup>2</sup> > 0.8 calculated via *clump/PLINK1.9* in UK Biobank are shown.

<sup>c</sup> This SNP was the top reported SNP in CKDGen.<sup>a</sup> It is included in the rs45551835 locus in UK Biobank results via the R<sup>2</sup> > 0.01 locus definition; therefore, linkage disequilibrium with other UK Biobank SNPs was not determined.

**Table S4. Forty-six variants included in Mendelian randomization analyses.**

| Lead variant | Nearest Gene(s)            | Description        | Chr | Position (hg19) | Effect Allele | Noneffect Allele | EAF   | Beta (log(mg/g)) | SE (log (mg/g)) | P value   |
|--------------|----------------------------|--------------------|-----|-----------------|---------------|------------------|-------|------------------|-----------------|-----------|
| rs12032996   | <i>PHC2-ZSCAN20</i>        | Intergenic         | 1   | 33920586        | G             | A                | 0.838 | 0.01463          | 0.00226         | 9.33E-11  |
| rs10157710   | <i>FOXD2-TRABD2B</i>       | Intergenic         | 1   | 47961691        | T             | C                | 0.802 | 0.019            | 0.00209         | 9.69E-20  |
| rs11162351   | <i>AK5</i>                 | Intronic           | 1   | 77944732        | C             | G                | 0.602 | 0.00952          | 0.0017          | 2.20E-08  |
| rs11264327   | <i>EFNA3-EFNA1</i>         | Intergenic         | 1   | 155095107       | A             | G                | 0.399 | 0.00987          | 0.00171         | 7.03E-09  |
| rs12727104   | <i>FMO4-PRRC2C</i>         | Intergenic         | 1   | 171423167       | G             | A                | 0.905 | 0.01614          | 0.00284         | 1.37E-08  |
| rs12727980   | <i>NR5A2-LINC00862</i>     | Intergenic         | 1   | 200259095       | C             | T                | 0.423 | 0.00957          | 0.0017          | 1.68E-08  |
| rs4665972    | <i>SNX17</i>               | Intronic           | 2   | 27598097        | T             | C                | 0.393 | 0.01176          | 0.00172         | 6.96E-12  |
| rs6750228    | <i>LOC730100</i>           | Intronic           | 2   | 51312124        | A             | T                | 0.047 | 0.02232          | 0.00398         | 2.07E-08  |
| rs13394343   | <i>SH2D6-MAT2A/PARTICL</i> | Intergenic         | 2   | 85754342        | C             | A                | 0.57  | 0.01053          | 0.00168         | 3.86E-10  |
| rs10207567   | <i>ICA1L</i>               | Intronic           | 2   | 203714973       | C             | G                | 0.813 | 0.01455          | 0.00214         | 1.00E-11  |
| rs1047891    | <i>CPS1</i>                | Missense           | 2   | 211540507       | C             | A                | 0.684 | 0.01205          | 0.00179         | 1.71E-11  |
| rs183131780  | <i>MIR548AR-LOC646736</i>  | Intergenic         | 2   | 226684886       | T             | C                | 0.002 | 0.19055          | 0.01959         | 2.33E-22  |
| rs35483183   | <i>COL4A4</i>              | Intronic           | 2   | 227876687       | A             | G                | 0.123 | 0.0149           | 0.00255         | 5.19E-09  |
| rs35924503   | <i>SPHKAP-PID1</i>         | Intergenic         | 2   | 229131286       | C             | T                | 0.001 | 0.24742          | 0.02518         | 8.68E-23  |
| rs6768627    | <i>MYL3</i>                | Downstream Variant | 3   | 46895376        | T             | C                | 0.069 | 0.01852          | 0.0033          | 2.06E-08  |
| rs112607182  | <i>PRKCI</i>               | Downstream Variant | 3   | 170027407       | T             | C                | 0.077 | 0.02279          | 0.00327         | 3.39E-12  |
| rs3805382    | <i>NMU</i>                 | Intronic           | 4   | 56471551        | A             | G                | 0.711 | 0.01015          | 0.00184         | 3.71E-08  |
| rs7654754    | <i>SHROOM3</i>             | Intronic           | 4   | 77409795        | G             | A                | 0.462 | 0.0102           | 0.00167         | 9.96E-10  |
| rs6535594    | <i>NR3C2</i>               | Intronic           | 4   | 149132756       | A             | G                | 0.496 | 0.01146          | 0.00167         | 7.12E-12  |
| rs189107782  | <i>LINC01262-FRG1</i>      | Intergenic         | 4   | 190729009       | T             | C                | 0.002 | 0.24502          | 0.02026         | 1.12E-33  |
| rs702634     | <i>ARL15</i>               | Intronic           | 5   | 53271420        | A             | G                | 0.692 | 0.01042          | 0.00181         | 8.03E-09  |
| rs7731168    | <i>CWC27</i>               | Intronic           | 5   | 64296471        | C             | G                | 0.233 | 0.01253          | 0.00197         | 2.19E-10  |
| rs4410790    | <i>AGR3-AHR</i>            | Intergenic         | 7   | 17284577        | C             | T                | 0.634 | 0.01798          | 0.00173         | 2.63E-25  |
| rs2023844    | <i>HOTTIP</i>              | Intronic           | 7   | 27243238        | A             | G                | 0.926 | 0.01934          | 0.00318         | 1.18E-09  |
| rs17158386   | <i>WIPF3-DPY19L2P3</i>     | Intergenic         | 7   | 29805361        | A             | G                | 0.262 | 0.0133           | 0.00191         | 3.65E-12  |
| rs55798132   | <i>LOC101927815-CSMD1</i>  | Intergenic         | 8   | 2666143         | G             | A                | 0.989 | 0.04472          | 0.00803         | 2.53E-08  |
| rs28601761   | <i>TRIB1-LINC00861</i>     | Intergenic         | 8   | 126500031       | C             | G                | 0.579 | 0.01136          | 0.00171         | 2.81E-11  |
| rs144994089  | <i>AQP7</i>                | Missense           | 9   | 33385156        | T             | C                | 0.001 | 0.1456           | 0.02562         | 1.32E-08  |
| rs45551835   | <i>CUBN</i>                | Missense           | 10  | 16932384        | A             | G                | 0.014 | 0.14237          | 0.00698         | 2.28E-92  |
| rs144360241  | <i>CUBN</i>                | Missense           | 10  | 16967417        | C             | T                | 0.005 | 0.08186          | 0.01234         | 3.31E-11  |
| rs1276720    | <i>CUBN</i>                | Intronic           | 10  | 16971426        | T             | C                | 0.745 | 0.01109          | 0.00193         | 8.98E-09  |
| rs141640975  | <i>CUBN</i>                | Missense           | 10  | 16992011        | A             | G                | 0.003 | 0.35876          | 0.01629         | 1.75E-107 |
| rs10995311   | <i>ADO</i>                 | Missense           | 10  | 64564934        | C             | G                | 0.553 | 0.00921          | 0.00168         | 4.49E-08  |
| rs67339103   | <i>C10orf11</i>            | Intronic           | 10  | 77893686        | A             | G                | 0.212 | 0.01522          | 0.00205         | 1.07E-13  |
| rs17368443   | <i>SBF2</i>                | Intronic           | 11  | 10296836        | C             | G                | 0.061 | 0.02071          | 0.00348         | 2.58E-09  |
| rs1124694    | <i>ZBED5AS1-GALNT18</i>    | Intergenic         | 11  | 11098676        | G             | A                | 0.331 | 0.00977          | 0.00178         | 4.43E-08  |
| rs2601006    | <i>CCT2</i>                | 5' UTR Variant     | 12  | 69979517        | C             | T                | 0.657 | 0.01176          | 0.00176         | 2.13E-11  |
| rs4288924    | <i>ZFP36L1-ACTN1</i>       | Intergenic         | 14  | 69302399        | G             | A                | 0.48  | 0.0098           | 0.00168         | 5.66E-09  |
| rs8035855    | <i>MAPKBP1</i>             | Intronic           | 15  | 42077961        | A             | G                | 0.644 | 0.01227          | 0.00174         | 1.91E-12  |
| rs1145074    | <i>SPATA5L1</i>            | Intronic           | 15  | 45703824        | T             | A                | 0.745 | 0.0114           | 0.00191         | 2.41E-09  |
| rs146311723  | <i>USP3</i>                | Intronic           | 15  | 63804507        | C             | T                | 0.174 | 0.01231          | 0.0022          | 2.25E-08  |
| rs2472297    | <i>CYP1A2-CYP1A1</i>       | Intergenic         | 15  | 75027880        | T             | C                | 0.267 | 0.01812          | 0.00188         | 5.31E-22  |
| rs2338796    | <i>FBXL20</i>              | Intronic           | 17  | 37555627        | A             | G                | 0.67  | 0.00989          | 0.00178         | 2.59E-08  |
| rs35572189   | <i>BAHCC1</i>              | Missense           | 17  | 79419025        | G             | A                | 0.638 | 0.01051          | 0.00174         | 1.44E-09  |
| rs784257     | <i>TCF4-LINC01415</i>      | Intergenic         | 18  | 53397199        | T             | C                | 0.187 | 0.01218          | 0.00215         | 1.37E-08  |
| rs838142     | <i>FUT1</i>                | 3' UTR Variant     | 19  | 49252151        | A             | G                | 0.723 | 0.01174          | 0.00187         | 3.13E-10  |

Chr, chromosome; EAF, effect allele frequency. For intergenic loci, nearest upstream and downstream RefSeq genes are indicated. Nearest gene should not be taken as evidence of causal gene. Description, most-severe consequence of nearest RefSeq gene.

**Table S5. Association of albuminuria genetic risk score with measured albuminuria in ARIC and Framingham Heart Study.**

| Cohort                 | Beta (log(mg/g)<br>Albuminuria per<br>SD predicted<br>Albuminuria) | Std. Error<br>(log(mg/g)<br>Albuminuria per<br>SD predicted<br>Albuminuria) | P value  |
|------------------------|--------------------------------------------------------------------|-----------------------------------------------------------------------------|----------|
| UK Biobank (reference) | 0.742                                                              | 0.014                                                                       | < 1E-300 |
| ARIC                   | 0.788                                                              | 0.198                                                                       | 6.72E-05 |
| Framingham Heart Study | 0.692                                                              | 0.197                                                                       | 4.38E-04 |

**Table S6. Sensitivity analyses for Mendelian randomization of restricted albuminuria genetic risk score with hypertension or blood pressure in UK Biobank.**

| Sample Size <sup>a</sup> | Number of |          | Exposure    | Outcome      | SNPs in |                         | Beta                     | SE                       | Cochran's Q | Cochran P value | MR-PRESSO | MR-PRESSO                 |                |
|--------------------------|-----------|----------|-------------|--------------|---------|-------------------------|--------------------------|--------------------------|-------------|-----------------|-----------|---------------------------|----------------|
|                          | Cases     | Controls |             |              | score   | Method                  | (log(OR)/SD Albuminuria) | (log(OR)/SD Albuminuria) |             |                 | P value   | Global RSS <sub>obs</sub> | Global P value |
| 382500                   | 124345    | 258155   | Albuminuria | Hypertension | 31      | Two-Stage Least-Squares | 0.313                    | 0.046                    | 1.01E-11    |                 |           |                           |                |
| 382500                   | 124345    | 258155   | Albuminuria | Hypertension | 31      | IVW Random Effects      | 0.314                    | 0.091                    | 0.001       | 118             | 2E-12     | 128                       | < 1E-5         |
| 382500                   | 124345    | 258155   | Albuminuria | Hypertension | 31      | Simple Median           | 0.433                    | 0.103                    | 2.80E-05    |                 |           |                           |                |
| 382500                   | 124345    | 258155   | Albuminuria | Hypertension | 31      | Weighted Median         | 0.256                    | 0.088                    | 0.003       |                 |           |                           |                |
| 382500                   | 124345    | 258155   | Albuminuria | Hypertension | 31      | Egger Slope             | 0.134                    | 0.126                    | 0.289       |                 |           |                           |                |
| 382500                   | 124345    | 258155   | Albuminuria | Hypertension | 31      | Egger Intercept         | 0.006                    | 0.003                    | 0.047       |                 |           |                           |                |

  

| Sample Size, Exposure <sup>b</sup> | Sample Size, Outcome <sup>c</sup> | Exposure    | Outcome          | SNPs in |                         | Beta                  | SE                    | Cochran's Q | Cochran P value | MR-PRESSO | MR-PRESSO                 |                |
|------------------------------------|-----------------------------------|-------------|------------------|---------|-------------------------|-----------------------|-----------------------|-------------|-----------------|-----------|---------------------------|----------------|
|                                    |                                   |             |                  | score   | Method                  | (mmHg/SD Albuminuria) | (mmHg/SD Albuminuria) |             |                 | P value   | Global RSS <sub>obs</sub> | Global P value |
| 382500                             | 381833                            | Albuminuria | SBP, Uncorrected | 32      | Two-Stage Least-Squares | 2.191                 | 0.361                 | 1.26E-09    |                 |           |                           |                |
| 382500                             | 381833                            | Albuminuria | SBP, Uncorrected | 32      | IVW Random Effects      | 2.187                 | 0.771                 | 0.005       | 142             | 4E-16     | 154                       | < 1E-5         |
| 382500                             | 381833                            | Albuminuria | SBP, Uncorrected | 32      | Simple Median           | 2.539                 | 0.778                 | 0.001       |                 |           |                           |                |
| 382500                             | 381833                            | Albuminuria | SBP, Uncorrected | 32      | Weighted Median         | 1.306                 | 0.641                 | 0.042       |                 |           |                           |                |
| 382500                             | 381833                            | Albuminuria | SBP, Uncorrected | 32      | Egger Slope             | -0.187                | 0.974                 | 0.847       |                 |           |                           |                |
| 382500                             | 381833                            | Albuminuria | SBP, Uncorrected | 32      | Egger Intercept         | 0.080                 | 0.024                 | 0.001       |                 |           |                           |                |
| 382500                             | 381833                            | Albuminuria | DBP, Uncorrected | 32      | Two-Stage Least-Squares | 0.974                 | 0.207                 | 2.62E-06    |                 |           |                           |                |
| 382500                             | 381833                            | Albuminuria | DBP, Uncorrected | 32      | IVW Random Effects      | 0.972                 | 0.414                 | 0.019       | 125             | 3E-13     | 136                       | < 1E-5         |
| 382500                             | 381833                            | Albuminuria | DBP, Uncorrected | 32      | Simple Median           | 0.889                 | 0.385                 | 0.021       |                 |           |                           |                |
| 382500                             | 381833                            | Albuminuria | DBP, Uncorrected | 32      | Weighted Median         | 0.830                 | 0.364                 | 0.022       |                 |           |                           |                |
| 382500                             | 381833                            | Albuminuria | DBP, Uncorrected | 32      | Egger Slope             | 0.207                 | 0.582                 | 0.722       |                 |           |                           |                |
| 382500                             | 381833                            | Albuminuria | DBP, Uncorrected | 32      | Egger Intercept         | 0.026                 | 0.014                 | 0.071       |                 |           |                           |                |

Restricted albuminuria genetic risk composed of SNPs with  $p < 9E-9$  for association with albuminuria + directional MR Steiger filtering (filtered to SNPs with  $R^2$  exposure  $> R^2$  outcome)  
 SBP, systolic blood pressure; DBP, diastolic blood pressure. Uncorrected, not adjusted for hypertensive medication use.

<sup>a</sup> Effects of SNPs on albuminuria and hypertension were calculated in 382500 individuals in UK Biobank

<sup>b</sup> Effects of SNPs on albuminuria were calculated in 382500 individuals in UK Biobank

<sup>c</sup> 381833 individuals in UK Biobank had blood pressure measurements

**Table S7. Sensitivity analyses for Mendelian randomization of albuminuria genetic risk score with hypertension in UK Biobank.**

| Sample Size <sup>a</sup>                                              | Number of Hypertension Cases | Number of Controls | Exposure    | Outcome      | SNPs in score  | Cook's distance of outlier removed | Method                  | Beta (log(OR)/SD Albuminuria) | SE (log(OR)/SD Albuminuria) | P value  | Cochran's Q | Cochran P value | MR-PRESSO Global RSS <sub>obs</sub> | MR-PRESSO Global P value |
|-----------------------------------------------------------------------|------------------------------|--------------------|-------------|--------------|----------------|------------------------------------|-------------------------|-------------------------------|-----------------------------|----------|-------------|-----------------|-------------------------------------|--------------------------|
| <b>Directional MR Steiger filtering</b>                               |                              |                    |             |              |                |                                    |                         |                               |                             |          |             |                 |                                     |                          |
| 382500                                                                | 124345                       | 258155             | Albuminuria | Hypertension | 43             | NA                                 | Two-Stage Least-Squares | 0.321                         | 0.043                       | 7.01E-14 |             |                 |                                     |                          |
|                                                                       |                              |                    |             |              | 43, unweighted |                                    |                         |                               |                             |          |             |                 |                                     |                          |
| 382500                                                                | 124345                       | 258155             | Albuminuria | Hypertension | allele score   | NA                                 | Two-Stage Least-Squares | 0.463                         | 0.058                       | 1.17E-15 |             |                 |                                     |                          |
| 382500                                                                | 124345                       | 258155             | Albuminuria | Hypertension | 43             | NA                                 | IVW Random Effects      | 0.322                         | 0.084                       | 1.25E-04 | 160         | 9E-16           | 171                                 | < 1E-05                  |
| 382500                                                                | 124345                       | 258155             | Albuminuria | Hypertension | 43             | NA                                 | Simple Median           | 0.435                         | 0.093                       | 2.91E-06 |             |                 |                                     |                          |
| 382500                                                                | 124345                       | 258155             | Albuminuria | Hypertension | 43             | NA                                 | Weighted Median         | 0.257                         | 0.087                       | 0.003    |             |                 |                                     |                          |
| 382500                                                                | 124345                       | 258155             | Albuminuria | Hypertension | 43             | NA                                 | Egger Slope             | 0.145                         | 0.123                       | 0.235    |             |                 |                                     |                          |
| 382500                                                                | 124345                       | 258155             | Albuminuria | Hypertension | 43             | NA                                 | Egger Intercept         | 0.006                         | 0.003                       | 0.053    |             |                 |                                     |                          |
| <b>Directional MR Steiger filtering + Outlier removed</b>             |                              |                    |             |              |                |                                    |                         |                               |                             |          |             |                 |                                     |                          |
| 382500                                                                | 124345                       | 258155             | Albuminuria | Hypertension | 42             | 0.63                               | Two-Stage Least-Squares | 0.389                         | 0.047                       | 2.65E-16 |             |                 |                                     |                          |
| 382500                                                                | 124345                       | 258155             | Albuminuria | Hypertension | 42             | 0.63                               | IVW Random Effects      | 0.389                         | 0.090                       | 1.50E-05 | 149         | 4E-14           | 156                                 | < 1E-05                  |
| 382500                                                                | 124345                       | 258155             | Albuminuria | Hypertension | 42             | 0.63                               | Simple Median           | 0.446                         | 0.091                       | 9.92E-07 |             |                 |                                     |                          |
| 382500                                                                | 124345                       | 258155             | Albuminuria | Hypertension | 42             | 0.63                               | Weighted Median         | 0.276                         | 0.084                       | 0.001    |             |                 |                                     |                          |
| 382500                                                                | 124345                       | 258155             | Albuminuria | Hypertension | 42             | 0.63                               | Egger Slope             | 0.238                         | 0.153                       | 0.120    |             |                 |                                     |                          |
| 382500                                                                | 124345                       | 258155             | Albuminuria | Hypertension | 42             | 0.63                               | Egger Intercept         | 0.004                         | 0.003                       | 0.222    |             |                 |                                     |                          |
| <b>Significant directional MR Steiger filtering</b>                   |                              |                    |             |              |                |                                    |                         |                               |                             |          |             |                 |                                     |                          |
| 382500                                                                | 124345                       | 258155             | Albuminuria | Hypertension | 35             | NA                                 | Two-Stage Least-Squares | 0.235                         | 0.045                       | 2.00E-07 |             |                 |                                     |                          |
| 382500                                                                | 124345                       | 258155             | Albuminuria | Hypertension | 35             | NA                                 | IVW Random Effects      | 0.236                         | 0.071                       | 9.13E-04 | 84          | 4E-06           | 91                                  | < 1E-05                  |
| 382500                                                                | 124345                       | 258155             | Albuminuria | Hypertension | 35             | NA                                 | Simple Median           | 0.385                         | 0.089                       | 1.66E-05 |             |                 |                                     |                          |
| 382500                                                                | 124345                       | 258155             | Albuminuria | Hypertension | 35             | NA                                 | Weighted Median         | 0.256                         | 0.082                       | 0.002    |             |                 |                                     |                          |
| 382500                                                                | 124345                       | 258155             | Albuminuria | Hypertension | 35             | NA                                 | Egger Slope             | 0.177                         | 0.103                       | 0.087    |             |                 |                                     |                          |
| 382500                                                                | 124345                       | 258155             | Albuminuria | Hypertension | 35             | NA                                 | Egger Intercept         | 0.002                         | 0.003                       | 0.421    |             |                 |                                     |                          |
| <b>Significant directional MR Steiger filtering + Outlier removed</b> |                              |                    |             |              |                |                                    |                         |                               |                             |          |             |                 |                                     |                          |
| 382500                                                                | 124345                       | 258155             | Albuminuria | Hypertension | 34             | 0.61                               | Two-Stage Least-Squares | 0.291                         | 0.051                       | 8.17E-09 |             |                 |                                     |                          |
| 382500                                                                | 124345                       | 258155             | Albuminuria | Hypertension | 34             | 0.61                               | IVW Random Effects      | 0.292                         | 0.077                       | 1.54E-04 | 78          | 2E-05           | 83                                  | 2E-05                    |
| 382500                                                                | 124345                       | 258155             | Albuminuria | Hypertension | 34             | 0.61                               | Simple Median           | 0.397                         | 0.089                       | 7.43E-06 |             |                 |                                     |                          |
| 382500                                                                | 124345                       | 258155             | Albuminuria | Hypertension | 34             | 0.61                               | Weighted Median         | 0.266                         | 0.090                       | 0.003    |             |                 |                                     |                          |
| 382500                                                                | 124345                       | 258155             | Albuminuria | Hypertension | 34             | 0.61                               | Egger Slope             | 0.285                         | 0.127                       | 0.025    |             |                 |                                     |                          |
| 382500                                                                | 124345                       | 258155             | Albuminuria | Hypertension | 34             | 0.61                               | Egger Intercept         | 2.02E-04                      | 0.003                       | 0.944    |             |                 |                                     |                          |

Directional MR Steiger filtering: filtered to SNPs with R<sup>2</sup> exposure > R<sup>2</sup> outcome

Significant directional MR Steiger filtering: filtered to SNPs with R<sup>2</sup> exposure > R<sup>2</sup> outcome AND Steiger P value < 0.05

<sup>a</sup> Effects of SNPs on albuminuria and hypertension were calculated in 382500 individuals in UK Biobank



**Table S8. Sensitivity analyses for Mendelian randomization of albuminuria genetic risk score with blood pressure in UK Biobank.**

| Sample Size, Exposure <sup>a</sup>                                    | Sample Size, Outcome <sup>b</sup> | Exposure    | Outcome          | SNPs in score  | Cook's distance of outlier removed | Method                  | Beta (mmHg/SD Albuminuria) | SE (mmHg/SD Albuminuria) | P value  | Cochran's Q | Cochran P value | MR-PRESSO Global RSS <sub>obs</sub> | MR-PRESSO Global P value |
|-----------------------------------------------------------------------|-----------------------------------|-------------|------------------|----------------|------------------------------------|-------------------------|----------------------------|--------------------------|----------|-------------|-----------------|-------------------------------------|--------------------------|
| <b>Systolic Blood Pressure</b>                                        |                                   |             |                  |                |                                    |                         |                            |                          |          |             |                 |                                     |                          |
| <b>Directional MR Steiger filtering</b>                               |                                   |             |                  |                |                                    |                         |                            |                          |          |             |                 |                                     |                          |
| 382500                                                                | 381833                            | Albuminuria | SBP, Uncorrected | 44             | NA                                 | Two-Stage Least-Squares | 2.165                      | 0.336                    | 1.22E-10 |             |                 |                                     |                          |
|                                                                       |                                   |             |                  | 44, unweighted |                                    |                         |                            |                          |          |             |                 |                                     |                          |
| 382500                                                                | 381833                            | Albuminuria | SBP, Uncorrected | allele score   | NA                                 | Two-Stage Least-Squares | 3.988                      | 0.445                    | 3.22E-19 |             |                 |                                     |                          |
| 382500                                                                | 381833                            | Albuminuria | SBP, Uncorrected | 44             | NA                                 | IVW Random Effects      | 2.160                      | 0.666                    | 0.001    | 169         | 7E-17           | 180                                 | < 1E-05                  |
| 382500                                                                | 381833                            | Albuminuria | SBP, Uncorrected | 44             | NA                                 | Simple Median           | 2.539                      | 0.689                    | 2.29E-04 |             |                 |                                     |                          |
| 382500                                                                | 381833                            | Albuminuria | SBP, Uncorrected | 44             | NA                                 | Weighted Median         | 1.306                      | 0.621                    | 0.035    |             |                 |                                     |                          |
| 382500                                                                | 381833                            | Albuminuria | SBP, Uncorrected | 44             | NA                                 | Egger Slope             | -0.209                     | 0.900                    | 0.817    |             |                 |                                     |                          |
| 382500                                                                | 381833                            | Albuminuria | SBP, Uncorrected | 44             | NA                                 | Egger Intercept         | 0.072                      | 0.021                    | 4.65E-04 |             |                 |                                     |                          |
| <b>Directional MR Steiger filtering + Outlier removed</b>             |                                   |             |                  |                |                                    |                         |                            |                          |          |             |                 |                                     |                          |
| 382500                                                                | 381833                            | Albuminuria | SBP, Uncorrected | 43             | 0.72                               | Two-Stage Least-Squares | 2.734                      | 0.369                    | 1.32E-13 |             |                 |                                     |                          |
| 382500                                                                | 381833                            | Albuminuria | SBP, Uncorrected | 43             | 0.72                               | IVW Random Effects      | 2.728                      | 0.707                    | 1.15E-04 | 155         | 7E-15           | 162                                 | < 1E-05                  |
| 382500                                                                | 381833                            | Albuminuria | SBP, Uncorrected | 43             | 0.72                               | Simple Median           | 2.553                      | 0.716                    | 3.67E-04 |             |                 |                                     |                          |
| 382500                                                                | 381833                            | Albuminuria | SBP, Uncorrected | 43             | 0.72                               | Weighted Median         | 1.530                      | 0.665                    | 0.021    |             |                 |                                     |                          |
| 382500                                                                | 381833                            | Albuminuria | SBP, Uncorrected | 43             | 0.72                               | Egger Slope             | 0.137                      | 1.134                    | 0.904    |             |                 |                                     |                          |
| 382500                                                                | 381833                            | Albuminuria | SBP, Uncorrected | 43             | 0.72                               | Egger Intercept         | 0.067                      | 0.024                    | 0.005    |             |                 |                                     |                          |
| <b>Significant directional MR Steiger filtering</b>                   |                                   |             |                  |                |                                    |                         |                            |                          |          |             |                 |                                     |                          |
| 382500                                                                | 381833                            | Albuminuria | SBP, Uncorrected | 39             | NA                                 | Two-Stage Least-Squares | 1.375                      | 0.348                    | 7.8E-05  |             |                 |                                     |                          |
| 382500                                                                | 381833                            | Albuminuria | SBP, Uncorrected | 39             | NA                                 | IVW Random Effects      | 1.372                      | 0.518                    | 0.008    | 85          | 2.0E-05         | 91                                  | 3.0E-05                  |
| 382500                                                                | 381833                            | Albuminuria | SBP, Uncorrected | 39             | NA                                 | Simple Median           | 1.523                      | 0.660                    | 0.021    |             |                 |                                     |                          |
| 382500                                                                | 381833                            | Albuminuria | SBP, Uncorrected | 39             | NA                                 | Weighted Median         | 0.928                      | 0.592                    | 0.117    |             |                 |                                     |                          |
| 382500                                                                | 381833                            | Albuminuria | SBP, Uncorrected | 39             | NA                                 | Egger Slope             | -0.037                     | 0.709                    | 0.958    |             |                 |                                     |                          |
| 382500                                                                | 381833                            | Albuminuria | SBP, Uncorrected | 39             | NA                                 | Egger Intercept         | 0.046                      | 0.017                    | 0.007    |             |                 |                                     |                          |
| <b>Significant directional MR Steiger filtering + Outlier removed</b> |                                   |             |                  |                |                                    |                         |                            |                          |          |             |                 |                                     |                          |
| 382500                                                                | 381833                            | Albuminuria | SBP, Uncorrected | 38             | 0.73                               | Two-Stage Least-Squares | 1.818                      | 0.385                    | 2.26E-06 |             |                 |                                     |                          |
| 382500                                                                | 381833                            | Albuminuria | SBP, Uncorrected | 38             | 0.73                               | IVW Random Effects      | 1.814                      | 0.554                    | 0.001    | 77          | 0.00011         | 81                                  | 0.00015                  |
| 382500                                                                | 381833                            | Albuminuria | SBP, Uncorrected | 38             | 0.73                               | Simple Median           | 1.863                      | 0.652                    | 0.004    |             |                 |                                     |                          |
| 382500                                                                | 381833                            | Albuminuria | SBP, Uncorrected | 38             | 0.73                               | Weighted Median         | 1.439                      | 0.673                    | 0.032    |             |                 |                                     |                          |
| 382500                                                                | 381833                            | Albuminuria | SBP, Uncorrected | 38             | 0.73                               | Egger Slope             | 0.382                      | 0.892                    | 0.669    |             |                 |                                     |                          |
| 382500                                                                | 381833                            | Albuminuria | SBP, Uncorrected | 38             | 0.73                               | Egger Intercept         | 0.039                      | 0.019                    | 0.046    |             |                 |                                     |                          |
| <b>Diastolic Blood Pressure</b>                                       |                                   |             |                  |                |                                    |                         |                            |                          |          |             |                 |                                     |                          |
| <b>Directional MR Steiger filtering</b>                               |                                   |             |                  |                |                                    |                         |                            |                          |          |             |                 |                                     |                          |
| 382500                                                                | 381833                            | Albuminuria | DBP, Uncorrected | 44             | NA                                 | Two-Stage Least-Squares | 0.986                      | 0.193                    | 3.40E-07 |             |                 |                                     |                          |
|                                                                       |                                   |             |                  | 44, unweighted |                                    |                         |                            |                          |          |             |                 |                                     |                          |
| 382500                                                                | 381833                            | Albuminuria | DBP, Uncorrected | allele score   | NA                                 | Two-Stage Least-Squares | 1.627                      | 0.256                    | 1.94E-10 |             |                 |                                     |                          |
| 382500                                                                | 381833                            | Albuminuria | DBP, Uncorrected | 44             | NA                                 | IVW Random Effects      | 0.984                      | 0.381                    | 0.010    | 169         | 6E-17           | 180                                 | < 1E-05                  |
| 382500                                                                | 381833                            | Albuminuria | DBP, Uncorrected | 44             | NA                                 | Simple Median           | 0.856                      | 0.354                    | 0.016    |             |                 |                                     |                          |
| 382500                                                                | 381833                            | Albuminuria | DBP, Uncorrected | 44             | NA                                 | Weighted Median         | 0.819                      | 0.352                    | 0.020    |             |                 |                                     |                          |
| 382500                                                                | 381833                            | Albuminuria | DBP, Uncorrected | 44             | NA                                 | Egger Slope             | 0.150                      | 0.559                    | 0.788    |             |                 |                                     |                          |
| 382500                                                                | 381833                            | Albuminuria | DBP, Uncorrected | 44             | NA                                 | Egger Intercept         | 0.025                      | 0.013                    | 0.048    |             |                 |                                     |                          |

**Directional MR Steiger filtering + Outlier removed**

|        |        |             |                  |    |      |                         |       |       |          |     |       |     |         |
|--------|--------|-------------|------------------|----|------|-------------------------|-------|-------|----------|-----|-------|-----|---------|
| 382500 | 381833 | Albuminuria | DBP, Uncorrected | 43 | 0.70 | Two-Stage Least-Squares | 1.305 | 0.212 | 8.08E-10 |     |       |     |         |
| 382500 | 381833 | Albuminuria | DBP, Uncorrected | 43 | 0.70 | IVW Random Effects      | 1.302 | 0.405 | 0.001    | 156 | 5E-15 | 162 | < 1E-05 |
| 382500 | 381833 | Albuminuria | DBP, Uncorrected | 43 | 0.70 | Simple Median           | 0.876 | 0.366 | 0.017    |     |       |     |         |
| 382500 | 381833 | Albuminuria | DBP, Uncorrected | 43 | 0.70 | Weighted Median         | 0.886 | 0.367 | 0.016    |     |       |     |         |
| 382500 | 381833 | Albuminuria | DBP, Uncorrected | 43 | 0.70 | Egger Slope             | 0.613 | 0.697 | 0.379    |     |       |     |         |
| 382500 | 381833 | Albuminuria | DBP, Uncorrected | 43 | 0.70 | Egger Intercept         | 0.018 | 0.015 | 0.226    |     |       |     |         |

**Significant directional MR Steiger filtering**

|        |        |             |                  |    |    |                         |       |       |       |    |       |     |         |
|--------|--------|-------------|------------------|----|----|-------------------------|-------|-------|-------|----|-------|-----|---------|
| 382500 | 381833 | Albuminuria | DBP, Uncorrected | 40 | NA | Two-Stage Least-Squares | 0.613 | 0.199 | 0.002 |    |       |     |         |
| 382500 | 381833 | Albuminuria | DBP, Uncorrected | 40 | NA | IVW Random Effects      | 0.611 | 0.314 | 0.051 | 99 | 4E-07 | 106 | < 1E-05 |
| 382500 | 381833 | Albuminuria | DBP, Uncorrected | 40 | NA | Simple Median           | 0.772 | 0.349 | 0.027 |    |       |     |         |
| 382500 | 381833 | Albuminuria | DBP, Uncorrected | 40 | NA | Weighted Median         | 0.791 | 0.343 | 0.021 |    |       |     |         |
| 382500 | 381833 | Albuminuria | DBP, Uncorrected | 40 | NA | Egger Slope             | 0.148 | 0.461 | 0.749 |    |       |     |         |
| 382500 | 381833 | Albuminuria | DBP, Uncorrected | 40 | NA | Egger Intercept         | 0.015 | 0.011 | 0.173 |    |       |     |         |

**Significant directional MR Steiger filtering + Outlier removed**

|        |        |             |                  |    |      |                         |       |       |          |    |       |    |         |
|--------|--------|-------------|------------------|----|------|-------------------------|-------|-------|----------|----|-------|----|---------|
| 382500 | 381833 | Albuminuria | DBP, Uncorrected | 39 | 0.69 | Two-Stage Least-Squares | 0.873 | 0.219 | 6.93E-05 |    |       |    |         |
| 382500 | 381833 | Albuminuria | DBP, Uncorrected | 39 | 0.68 | IVW Random Effects      | 0.870 | 0.336 | 0.010    | 91 | 3E-06 | 95 | < 1E-05 |
| 382500 | 381833 | Albuminuria | DBP, Uncorrected | 39 | 0.68 | Simple Median           | 0.791 | 0.357 | 0.027    |    |       |    |         |
| 382500 | 381833 | Albuminuria | DBP, Uncorrected | 39 | 0.68 | Weighted Median         | 0.879 | 0.371 | 0.018    |    |       |    |         |
| 382500 | 381833 | Albuminuria | DBP, Uncorrected | 39 | 0.68 | Egger Slope             | 0.602 | 0.571 | 0.292    |    |       |    |         |
| 382500 | 381833 | Albuminuria | DBP, Uncorrected | 39 | 0.68 | Egger Intercept         | 0.007 | 0.012 | 0.559    |    |       |    |         |

SBP, systolic blood pressure; DBP, diastolic blood pressure. Uncorrected, not adjusted for hypertensive medication use.

Directional MR Steiger filtering: filtered to SNPs with  $R^2$  exposure >  $R^2$  outcome

Significant directional MR Steiger filtering: filtered to SNPs with  $R^2$  exposure >  $R^2$  outcome AND Steiger P value < 0.05

<sup>a</sup> Effects of SNPs on albuminuria were calculated in 382500 individuals in UK Biobank

<sup>b</sup> 381833 individuals in UK Biobank had blood pressure measurements

**Table S9. Sensitivity analyses for Mendelian randomization of blood pressure genetic risk scores from ICBP Cardio-MetaboChip with albuminuria in UK Biobank.**

| Sample Size, Exposure <sup>a</sup>                        | Sample Size, Outcome <sup>b</sup> | Exposure       | Outcome     | Cook's SNPs in score | distance of outlier removed | SNP in LD removed | Method                  | Beta (mmHg/SD Albuminuria) | SE (mmHg/SD Albuminuria) | P value  | Cochran's Q | Cochran P value | MR-PRESSO Global RSS <sub>obs</sub> | MR-PRESSO Global P value |
|-----------------------------------------------------------|-----------------------------------|----------------|-------------|----------------------|-----------------------------|-------------------|-------------------------|----------------------------|--------------------------|----------|-------------|-----------------|-------------------------------------|--------------------------|
| <b>Systolic Blood Pressure</b>                            |                                   |                |             |                      |                             |                   |                         |                            |                          |          |             |                 |                                     |                          |
| <b>Directional MR Steiger filtering</b>                   |                                   |                |             |                      |                             |                   |                         |                            |                          |          |             |                 |                                     |                          |
| 201529                                                    | 381833 <sup>c</sup>               | SBP, Corrected | Albuminuria | 47                   | NA                          | NA                | Two-Stage Least-Squares | 0.0050                     | 0.0007                   | 2.45E-13 |             |                 |                                     |                          |
| 201529                                                    | 382500                            | SBP, Corrected | Albuminuria | 47                   | NA                          | NA                | IVW Random Effects      | 0.0053                     | 0.0015                   | 2.55E-04 | 157         | 5E-14           | 164                                 | < 1E-5                   |
| 201529                                                    | 382500                            | SBP, Corrected | Albuminuria | 47                   | NA                          | NA                | Simple Median           | 0.0052                     | 0.0013                   | 6.15E-05 |             |                 |                                     |                          |
| 201529                                                    | 382500                            | SBP, Corrected | Albuminuria | 47                   | NA                          | NA                | Weighted Median         | 0.0051                     | 0.0013                   | 5.44E-05 |             |                 |                                     |                          |
| 201529                                                    | 382500                            | SBP, Corrected | Albuminuria | 47                   | NA                          | NA                | Egger Slope             | 0.0050                     | 0.0051                   | 0.331    |             |                 |                                     |                          |
| 201529                                                    | 382500                            | SBP, Corrected | Albuminuria | 47                   | NA                          | NA                | Egger Intercept         | 0.0002                     | 0.0025                   | 0.941    |             |                 |                                     |                          |
| <b>Directional MR Steiger filtering + Outlier removed</b> |                                   |                |             |                      |                             |                   |                         |                            |                          |          |             |                 |                                     |                          |
| 201529                                                    | 381833 <sup>c</sup>               | SBP, Corrected | Albuminuria | 46                   | 0.37                        | NA                | Two-Stage Least-Squares | 0.0058                     | 0.0007                   | 3.19E-17 |             |                 |                                     |                          |
| 201529                                                    | 382500                            | SBP, Corrected | Albuminuria | 46                   | 0.37                        | NA                | IVW Random Effects      | 0.0062                     | 0.0012                   | 5.64E-07 | 109         | 3E-07           | 113                                 | < 1E-5                   |
| 201529                                                    | 382500                            | SBP, Corrected | Albuminuria | 46                   | 0.37                        | NA                | Simple Median           | 0.0053                     | 0.0013                   | 3.69E-05 |             |                 |                                     |                          |
| 201529                                                    | 382500                            | SBP, Corrected | Albuminuria | 46                   | 0.37                        | NA                | Weighted Median         | 0.0052                     | 0.0013                   | 4.51E-05 |             |                 |                                     |                          |
| 201529                                                    | 382500                            | SBP, Corrected | Albuminuria | 46                   | 0.37                        | NA                | Egger Slope             | 0.0064                     | 0.0043                   | 0.137    |             |                 |                                     |                          |
| 201529                                                    | 382500                            | SBP, Corrected | Albuminuria | 46                   | 0.37                        | NA                | Egger Intercept         | -0.0001                    | 0.0021                   | 0.962    |             |                 |                                     |                          |
| <b>Directional MR Steiger filtering + LD SNP removed</b>  |                                   |                |             |                      |                             |                   |                         |                            |                          |          |             |                 |                                     |                          |
| 201529                                                    | 381833 <sup>c</sup>               | SBP, Corrected | Albuminuria | 46                   | NA                          | rs3735533         | Two-Stage Least-Squares | 0.0045                     | 0.0007                   | 6.26E-11 |             |                 |                                     |                          |
| 201529                                                    | 382500                            | SBP, Corrected | Albuminuria | 46                   | NA                          | rs3735533         | IVW Random Effects      | 0.0048                     | 0.0014                   | 4.82E-04 | 135         | 7E-11           | 141                                 | < 1E-5                   |
| 201529                                                    | 382500                            | SBP, Corrected | Albuminuria | 46                   | NA                          | rs3735533         | Simple Median           | 0.0051                     | 0.0013                   | 5.48E-05 |             |                 |                                     |                          |
| 201529                                                    | 382500                            | SBP, Corrected | Albuminuria | 46                   | NA                          | rs3735533         | Weighted Median         | 0.0051                     | 0.0013                   | 5.99E-05 |             |                 |                                     |                          |
| 201529                                                    | 382500                            | SBP, Corrected | Albuminuria | 46                   | NA                          | rs3735533         | Egger Slope             | 0.0023                     | 0.0049                   | 0.629    |             |                 |                                     |                          |
| 201529                                                    | 382500                            | SBP, Corrected | Albuminuria | 46                   | NA                          | rs3735533         | Egger Intercept         | 0.0013                     | 0.0024                   | 0.598    |             |                 |                                     |                          |
| <b>Diastolic Blood Pressure</b>                           |                                   |                |             |                      |                             |                   |                         |                            |                          |          |             |                 |                                     |                          |
| <b>Directional MR Steiger filtering</b>                   |                                   |                |             |                      |                             |                   |                         |                            |                          |          |             |                 |                                     |                          |
| 201529                                                    | 381833 <sup>c</sup>               | DBP, Corrected | Albuminuria | 52                   | NA                          | NA                | Two-Stage Least-Squares | 0.0070                     | 0.0012                   | 1.83E-09 |             |                 |                                     |                          |
| 201529                                                    | 382500                            | DBP, Corrected | Albuminuria | 52                   | NA                          | NA                | IVW Random Effects      | 0.0071                     | 0.0025                   | 3.81E-03 | 192         | 4E-18           | 199                                 | < 1E-5                   |
| 201529                                                    | 382500                            | DBP, Corrected | Albuminuria | 52                   | NA                          | NA                | Simple Median           | 0.0053                     | 0.0021                   | 0.011    |             |                 |                                     |                          |
| 201529                                                    | 382500                            | DBP, Corrected | Albuminuria | 52                   | NA                          | NA                | Weighted Median         | 0.0075                     | 0.0021                   | 2.90E-04 |             |                 |                                     |                          |
| 201529                                                    | 382500                            | DBP, Corrected | Albuminuria | 52                   | NA                          | NA                | Egger Slope             | 0.0067                     | 0.0090                   | 0.457    |             |                 |                                     |                          |
| 201529                                                    | 382500                            | DBP, Corrected | Albuminuria | 52                   | NA                          | NA                | Egger Intercept         | 0.0001                     | 0.0027                   | 0.958    |             |                 |                                     |                          |
| <b>Directional MR Steiger filtering + Outlier removed</b> |                                   |                |             |                      |                             |                   |                         |                            |                          |          |             |                 |                                     |                          |
| 201529                                                    | 381833 <sup>c</sup>               | DBP, Corrected | Albuminuria | 51                   | 0.37                        | NA                | Two-Stage Least-Squares | 0.0085                     | 0.0012                   | 6.66E-13 |             |                 |                                     |                          |
| 201529                                                    | 382500                            | DBP, Corrected | Albuminuria | 51                   | 0.37                        | NA                | IVW Random Effects      | 0.0086                     | 0.0022                   | 8.46E-05 | 145         | 4E-11           | 150                                 | < 1E-5                   |
| 201529                                                    | 382500                            | DBP, Corrected | Albuminuria | 51                   | 0.37                        | NA                | Simple Median           | 0.0054                     | 0.0021                   | 0.011    |             |                 |                                     |                          |
| 201529                                                    | 382500                            | DBP, Corrected | Albuminuria | 51                   | 0.37                        | NA                | Weighted Median         | 0.0086                     | 0.0021                   | 3.38E-05 |             |                 |                                     |                          |
| 201529                                                    | 382500                            | DBP, Corrected | Albuminuria | 51                   | 0.37                        | NA                | Egger Slope             | 0.0106                     | 0.0079                   | 0.181    |             |                 |                                     |                          |
| 201529                                                    | 382500                            | DBP, Corrected | Albuminuria | 51                   | 0.37                        | NA                | Egger Intercept         | -0.0006                    | 0.0024                   | 0.794    |             |                 |                                     |                          |
| <b>Directional MR Steiger filtering + LD SNP removed</b>  |                                   |                |             |                      |                             |                   |                         |                            |                          |          |             |                 |                                     |                          |
| 201529                                                    | 381833 <sup>c</sup>               | DBP, Corrected | Albuminuria | 51                   | NA                          | rs3735533         | Two-Stage Least-Squares | 0.0062                     | 0.0012                   | 1.17E-07 |             |                 |                                     |                          |
| 201529                                                    | 382500                            | DBP, Corrected | Albuminuria | 51                   | NA                          | rs3735533         | IVW Random Effects      | 0.0063                     | 0.0023                   | 0.007    | 167         | 2E-14           | 174                                 | < 1E-5                   |
| 201529                                                    | 382500                            | DBP, Corrected | Albuminuria | 51                   | NA                          | rs3735533         | Simple Median           | 0.0051                     | 0.0021                   | 0.015    |             |                 |                                     |                          |
| 201529                                                    | 382500                            | DBP, Corrected | Albuminuria | 51                   | NA                          | rs3735533         | Weighted Median         | 0.0068                     | 0.0021                   | 9.76E-04 |             |                 |                                     |                          |

|        |        |                |             |    |    |           |                 |        |        |       |
|--------|--------|----------------|-------------|----|----|-----------|-----------------|--------|--------|-------|
| 201529 | 382500 | DBP, Corrected | Albuminuria | 51 | NA | rs3735533 | Egger Slope     | 0.0030 | 0.0085 | 0.723 |
| 201529 | 382500 | DBP, Corrected | Albuminuria | 51 | NA | rs3735533 | Egger Intercept | 0.0010 | 0.0026 | 0.687 |

SBP, systolic blood pressure; DBP, diastolic blood pressure. Corrected, corrected for hypertensive medication use.

Directional MR Steiger filtering: filtered to SNPs with  $R^2$  exposure >  $R^2$  outcome

<sup>a</sup> Effects on blood pressure were calculated in up to 201529 individuals in the International Consortium for Blood Pressure Cardio-MetaboChip study (Ehret *et al* 2016. Nature Genetics. PMID 27618452)

<sup>b</sup> Effects of SNPs on albuminuria were calculated in 382500 individuals in UK Biobank (not applicable for two-stage least-squares regression)

<sup>c</sup> 381833 individuals in UK Biobank had both albuminuria and blood pressure measurements required for two-stage least-squares regression

**Table S10. Sensitivity analyses for Mendelian randomization of albuminuria genetic risk score in UK Biobank with blood pressure in ICBP 1000G.**

| Sample Size, Exposure <sup>a</sup>                        | Sample Size, Outcome <sup>b</sup> | Exposure    | Outcome        | SNPs in score | Cook's distance of outlier removed | Method             | Beta (mmHg/SD Albuminuria) | SE (mmHg/SD Albuminuria) | P value  | Cochran's Q | Cochran P value | MR-PRESSO Global RSS <sub>obs</sub> | MR-PRESSO Global P value |
|-----------------------------------------------------------|-----------------------------------|-------------|----------------|---------------|------------------------------------|--------------------|----------------------------|--------------------------|----------|-------------|-----------------|-------------------------------------|--------------------------|
| <b>Systolic Blood Pressure</b>                            |                                   |             |                |               |                                    |                    |                            |                          |          |             |                 |                                     |                          |
| <b>Directional MR Steiger filtering</b>                   |                                   |             |                |               |                                    |                    |                            |                          |          |             |                 |                                     |                          |
| 382500                                                    | 150134                            | Albuminuria | SBP, Corrected | 37            | NA                                 | IVW Fixed Effects  | 2.689                      | 0.768                    | 4.64E-04 |             |                 |                                     |                          |
| 382500                                                    | 150134                            | Albuminuria | SBP, Corrected | 37            | NA                                 | IVW Random Effects | 2.689                      | 1.162                    | 0.021    | 82          | 2E-05           | 110                                 | < 1E-05                  |
| 382500                                                    | 150134                            | Albuminuria | SBP, Corrected | 37            | NA                                 | Simple Median      | 2.792                      | 1.260                    | 0.027    |             |                 |                                     |                          |
| 382500                                                    | 150134                            | Albuminuria | SBP, Corrected | 37            | NA                                 | Weighted Median    | 2.639                      | 1.325                    | 0.046    |             |                 |                                     |                          |
| 382500                                                    | 150134                            | Albuminuria | SBP, Corrected | 37            | NA                                 | Egger Slope        | 0.045                      | 2.588                    | 0.986    |             |                 |                                     |                          |
| 382500                                                    | 150134                            | Albuminuria | SBP, Corrected | 37            | NA                                 | Egger Intercept    | 0.055                      | 0.048                    | 0.253    |             |                 |                                     |                          |
| <b>Directional MR Steiger filtering + Outlier removed</b> |                                   |             |                |               |                                    |                    |                            |                          |          |             |                 |                                     |                          |
| 382500                                                    | 150134                            | Albuminuria | SBP, Corrected | 36            | 0.44                               | IVW Fixed Effects  | 3.457                      | 0.784                    | 1.05E-05 |             |                 |                                     |                          |
| 382500                                                    | 150134                            | Albuminuria | SBP, Corrected | 36            | 0.44                               | IVW Random Effects | 3.457                      | 1.019                    | 6.92E-04 | 59          | 0.007           | 78                                  | 0.0003                   |
| 382500                                                    | 150134                            | Albuminuria | SBP, Corrected | 36            | 0.44                               | Simple Median      | 3.708                      | 1.241                    | 0.003    |             |                 |                                     |                          |
| 382500                                                    | 150134                            | Albuminuria | SBP, Corrected | 36            | 0.44                               | Weighted Median    | 2.657                      | 1.316                    | 0.044    |             |                 |                                     |                          |
| 382500                                                    | 150134                            | Albuminuria | SBP, Corrected | 36            | 0.44                               | Egger Slope        | 1.218                      | 2.246                    | 0.588    |             |                 |                                     |                          |
| 382500                                                    | 150134                            | Albuminuria | SBP, Corrected | 36            | 0.44                               | Egger Intercept    | 0.046                      | 0.041                    | 0.264    |             |                 |                                     |                          |
| <b>Diastolic Blood Pressure</b>                           |                                   |             |                |               |                                    |                    |                            |                          |          |             |                 |                                     |                          |
| <b>Directional MR Steiger filtering</b>                   |                                   |             |                |               |                                    |                    |                            |                          |          |             |                 |                                     |                          |
| 382500                                                    | 150134                            | Albuminuria | DBP, Corrected | 35            | NA                                 | IVW Fixed Effects  | 1.033                      | 0.477                    | 0.030    |             |                 |                                     |                          |
| 382500                                                    | 150134                            | Albuminuria | DBP, Corrected | 35            | NA                                 | IVW Random Effects | 1.033                      | 0.775                    | 0.183    | 90          | 6E-07           | 118                                 | < 1E-05                  |
| 382500                                                    | 150134                            | Albuminuria | DBP, Corrected | 35            | NA                                 | Simple Median      | 3.093                      | 0.798                    | 1.06E-04 |             |                 |                                     |                          |
| 382500                                                    | 150134                            | Albuminuria | DBP, Corrected | 35            | NA                                 | Weighted Median    | 0.854                      | 0.805                    | 0.289    |             |                 |                                     |                          |
| 382500                                                    | 150134                            | Albuminuria | DBP, Corrected | 35            | NA                                 | Egger Slope        | -0.442                     | 1.732                    | 0.799    |             |                 |                                     |                          |
| 382500                                                    | 150134                            | Albuminuria | DBP, Corrected | 35            | NA                                 | Egger Intercept    | 0.031                      | 0.033                    | 0.341    |             |                 |                                     |                          |
| <b>Directional MR Steiger filtering + Outlier removed</b> |                                   |             |                |               |                                    |                    |                            |                          |          |             |                 |                                     |                          |
| 382500                                                    | 150134                            | Albuminuria | DBP, Corrected | 34            | 0.45                               | IVW Fixed Effects  | 1.552                      | 0.487                    | 0.001    |             |                 |                                     |                          |
| 382500                                                    | 150134                            | Albuminuria | DBP, Corrected | 34            | 0.45                               | IVW Random Effects | 1.552                      | 0.677                    | 0.022    | 64          | 0.001           | 83                                  | 2E-05                    |
| 382500                                                    | 150134                            | Albuminuria | DBP, Corrected | 34            | 0.45                               | Simple Median      | 3.127                      | 0.786                    | 6.94E-05 |             |                 |                                     |                          |
| 382500                                                    | 150134                            | Albuminuria | DBP, Corrected | 34            | 0.45                               | Weighted Median    | 0.897                      | 0.789                    | 0.255    |             |                 |                                     |                          |
| 382500                                                    | 150134                            | Albuminuria | DBP, Corrected | 34            | 0.45                               | Egger Slope        | 0.316                      | 1.494                    | 0.833    |             |                 |                                     |                          |
| 382500                                                    | 150134                            | Albuminuria | DBP, Corrected | 34            | 0.45                               | Egger Intercept    | 0.026                      | 0.028                    | 0.353    |             |                 |                                     |                          |

SBP, systolic blood pressure; DBP, diastolic blood pressure. Corrected, corrected for hypertensive medication use.

Directional MR Steiger filtering: filtered to SNPs with  $R^2$  exposure >  $R^2$  outcome

<sup>a</sup> Effects of SNPs on albuminuria were calculated in 382500 individuals in UK Biobank

<sup>b</sup> Effects of SNPs on blood pressure were calculated in up to 150534 individuals in the International Consortium for Blood Pressure 1000G imputation (Wain *et al* 2017. Hypertension. PMID 28739976)

**Table S11. Genome-wide association study of albuminuria in 302687 individuals in UK Biobank without hypertensive medication use**

| Lead variant | Nearest Gene(s)        | Description                                       | Chr | Position (hg19) | Effect Allele | Noneffect Allele | EAF   | Beta (log(mg/g)) | SE (log(mg/g)) | P value  |
|--------------|------------------------|---------------------------------------------------|-----|-----------------|---------------|------------------|-------|------------------|----------------|----------|
| rs10157710   | <i>FOXD2-TRABD2B</i>   | Intergenic                                        | 1   | 47961691        | T             | C                | 0.802 | 0.01599          | 0.00219        | 3.02E-13 |
| rs4665972    | <i>SNX17</i>           | Intronic, noncoding RNA variant                   | 2   | 27598097        | T             | C                | 0.392 | 0.01104          | 0.00180        | 8.28E-10 |
| rs6712846    | <i>CPO-KLF7</i>        | Intergenic                                        | 2   | 207889080       | A             | G                | 0.525 | 0.00954          | 0.00175        | 4.88E-08 |
| rs1047891    | <i>CPS1</i>            | Missense                                          | 2   | 211540507       | C             | A                | 0.683 | 0.01031          | 0.00188        | 3.98E-08 |
| rs183131780  | <i>NYAP2-LOC646736</i> | Intergenic                                        | 2   | 226684886       | T             | C                | 0.002 | 0.13566          | 0.02080        | 6.99E-11 |
| rs35483183   | <i>COL4A4</i>          | Intronic                                          | 2   | 227876687       | A             | G                | 0.123 | 0.01502          | 0.00268        | 1.98E-08 |
| rs35924503   | <i>SPHKAP-PID1</i>     | Intergenic                                        | 2   | 229131286       | C             | T                | 0.001 | 0.17391          | 0.02693        | 1.06E-10 |
| rs7670121    | <i>NR3C2</i>           | Intronic, noncoding RNA variant                   | 4   | 149128595       | G             | A                | 0.240 | 0.01161          | 0.00205        | 1.36E-08 |
| rs189107782  | <i>LINC01262-FRG1</i>  | Intergenic                                        | 4   | 190729009       | T             | C                | 0.002 | 0.20163          | 0.02131        | 3.11E-21 |
| rs7731168    | <i>CWC27</i>           | Intronic                                          | 5   | 64296471        | C             | G                | 0.233 | 0.01183          | 0.00207        | 1.09E-08 |
| rs4410790    | <i>AGR3-AHR</i>        | Intergenic                                        | 7   | 17284577        | C             | T                | 0.633 | 0.01595          | 0.00181        | 1.35E-18 |
| rs4738817    | <i>CHD7</i>            | Intronic                                          | 8   | 61620613        | G             | A                | 0.549 | 0.00976          | 0.00176        | 2.73E-08 |
| rs28601761   | <i>TRIB1-LINC00861</i> | Intergenic                                        | 8   | 126500031       | C             | G                | 0.579 | 0.01059          | 0.00179        | 3.26E-09 |
| rs45551835   | <i>CUBN</i>            | Missense                                          | 10  | 16932384        | A             | G                | 0.014 | 0.11178          | 0.00739        | 1.15E-51 |
| rs144360241  | <i>CUBN</i>            | Missense                                          | 10  | 16967417        | C             | T                | 0.005 | 0.07690          | 0.01303        | 3.60E-09 |
| rs141640975  | <i>CUBN</i>            | Missense                                          | 10  | 16992011        | A             | G                | 0.003 | 0.33405          | 0.01718        | 3.35E-84 |
| rs2236295    | <i>ADO</i>             | Missense, TFBS variant, Regulatory region variant | 10  | 64564892        | G             | T                | 0.593 | 0.01020          | 0.00178        | 1.10E-08 |
| rs67339103   | <i>LRMDA</i>           | Intronic, noncoding RNA variant                   | 10  | 77893686        | A             | G                | 0.213 | 0.01328          | 0.00215        | 6.02E-10 |
| rs2601006    | <i>CCT2</i>            | 5' UTR variant, Intronic                          | 12  | 69979517        | C             | T                | 0.657 | 0.01086          | 0.00184        | 3.55E-09 |
| rs3759794    | <i>LTK</i>             | Upstream variant, Regulatory region variant       | 15  | 41806658        | G             | A                | 0.883 | 0.01553          | 0.00272        | 1.17E-08 |
| rs16943246   | <i>C15orf48</i>        | Upstream variant                                  | 15  | 45720597        | G             | A                | 0.753 | 0.01155          | 0.00203        | 1.30E-08 |
| rs2470893    | <i>CYP1A1</i>          | Upstream variant                                  | 15  | 75019449        | T             | C                | 0.335 | 0.01495          | 0.00185        | 5.87E-16 |
| rs838142     | <i>FUT1</i>            | 3' UTR Variant                                    | 19  | 49252151        | A             | G                | 0.723 | 0.01189          | 0.00196        | 1.21E-09 |

Chr, chromosome; EAF, effect allele frequency. For intergenic loci, nearest upstream and downstream RefSeq genes are indicated. Nearest gene should not be taken as evidence of causal gene. Description indicates VEP most severe consequences of nearest gene and any regulatory annotations associated with lead variant

**Table S12. Sensitivity analyses for Mendelian randomization of albuminuria genetic risk score with blood pressure in UK Biobank participants not on anti-hypertensive medications.**

| Sample Size <sup>a</sup>                                  | Exposure    | Outcome      | SNPs in score               | Cook's distance of outlier removed | Method                  | Beta (mmHg/SD Albuminuria) | SE (mmHg/SD Albuminuria) | P value  | Cochran's Q | Cochran P value | MR-PRESSO Global RSS <sub>obs</sub> | MR-PRESSO Global P value |
|-----------------------------------------------------------|-------------|--------------|-----------------------------|------------------------------------|-------------------------|----------------------------|--------------------------|----------|-------------|-----------------|-------------------------------------|--------------------------|
| <b><u>Systolic Blood Pressure</u></b>                     |             |              |                             |                                    |                         |                            |                          |          |             |                 |                                     |                          |
| <b>Directional MR Steiger filtering</b>                   |             |              |                             |                                    |                         |                            |                          |          |             |                 |                                     |                          |
| 302687                                                    | Albuminuria | Systolic BP  | 22                          | NA                                 | Two-Stage Least-Squares | 1.455                      | 0.472                    | 0.002    |             |                 |                                     |                          |
|                                                           |             |              | 22, unweighted allele score | NA                                 | Two-Stage Least-Squares | 2.904                      | 0.665                    | 1.27E-05 |             |                 |                                     |                          |
| 302687                                                    | Albuminuria | Systolic BP  | 22                          | NA                                 | IVW Random Effects      | 1.455                      | 0.873                    | 0.096    | 71          | 2E-07           | 80                                  | < 1E-05                  |
| 302687                                                    | Albuminuria | Systolic BP  | 22                          | NA                                 | Simple Median           | 2.443                      | 0.862                    | 0.005    |             |                 |                                     |                          |
| 302687                                                    | Albuminuria | Systolic BP  | 22                          | NA                                 | Weighted Median         | 0.415                      | 0.779                    | 0.594    |             |                 |                                     |                          |
| 302687                                                    | Albuminuria | Systolic BP  | 22                          | NA                                 | Egger Slope             | 0.004                      | 1.179                    | 0.997    |             |                 |                                     |                          |
| 302687                                                    | Albuminuria | Systolic BP  | 22                          | NA                                 | Egger Intercept         | 0.054                      | 0.031                    | 0.082    |             |                 |                                     |                          |
| <b>Directional MR Steiger filtering + Outlier removed</b> |             |              |                             |                                    |                         |                            |                          |          |             |                 |                                     |                          |
| 302687                                                    | Albuminuria | Systolic BP  | 21                          | 0.78                               | Two-Stage Least-Squares | 2.224                      | 0.550                    | 5.21E-05 |             |                 |                                     |                          |
| 302687                                                    | Albuminuria | Systolic BP  | 21                          | 0.78                               | IVW Random Effects      | 2.224                      | 0.985                    | 0.024    | 64          | 2E-06           | 69                                  | < 1E-05                  |
| 302687                                                    | Albuminuria | Systolic BP  | 21                          | 0.78                               | Simple Median           | 2.453                      | 0.910                    | 0.007    |             |                 |                                     |                          |
| 302687                                                    | Albuminuria | Systolic BP  | 21                          | 0.78                               | Weighted Median         | 2.433                      | 0.877                    | 0.006    |             |                 |                                     |                          |
| 302687                                                    | Albuminuria | Systolic BP  | 21                          | 0.78                               | Egger Slope             | 0.817                      | 1.661                    | 0.623    |             |                 |                                     |                          |
| 302687                                                    | Albuminuria | Systolic BP  | 21                          | 0.78                               | Egger Intercept         | 0.039                      | 0.037                    | 0.293    |             |                 |                                     |                          |
| <b><u>Diastolic Blood Pressure</u></b>                    |             |              |                             |                                    |                         |                            |                          |          |             |                 |                                     |                          |
| <b>Directional MR Steiger filtering</b>                   |             |              |                             |                                    |                         |                            |                          |          |             |                 |                                     |                          |
| 302687                                                    | Albuminuria | Diastolic BP | 22                          | NA                                 | Two-Stage Least-Squares | 0.672                      | 0.272                    | 0.014    |             |                 |                                     |                          |
|                                                           |             |              | 22, unweighted allele score | NA                                 | Two-Stage Least-Squares | 1.015                      | 0.384                    | 0.008    |             |                 |                                     |                          |
| 302687                                                    | Albuminuria | Diastolic BP | 22                          | NA                                 | IVW Random Effects      | 0.672                      | 0.494                    | 0.174    | 69          | 5E-07           | 76                                  | < 1E-05                  |
| 302687                                                    | Albuminuria | Diastolic BP | 22                          | NA                                 | Simple Median           | 0.898                      | 0.483                    | 0.063    |             |                 |                                     |                          |
| 302687                                                    | Albuminuria | Diastolic BP | 22                          | NA                                 | Weighted Median         | 0.465                      | 0.430                    | 0.280    |             |                 |                                     |                          |
| 302687                                                    | Albuminuria | Diastolic BP | 22                          | NA                                 | Egger Slope             | 0.329                      | 0.708                    | 0.643    |             |                 |                                     |                          |
| 302687                                                    | Albuminuria | Diastolic BP | 22                          | NA                                 | Egger Intercept         | 0.013                      | 0.019                    | 0.493    |             |                 |                                     |                          |
| <b>Directional MR Steiger filtering + Outlier removed</b> |             |              |                             |                                    |                         |                            |                          |          |             |                 |                                     |                          |
| 302687                                                    | Albuminuria | Diastolic BP | 21                          | 0.47                               | Two-Stage Least-Squares | 1.010                      | 0.317                    | 0.001    |             |                 |                                     |                          |
| 302687                                                    | Albuminuria | Diastolic BP | 21                          | 0.47                               | IVW Random Effects      | 1.010                      | 0.570                    | 0.077    | 65          | 1E-06           | 70                                  | < 1E-05                  |
| 302687                                                    | Albuminuria | Diastolic BP | 21                          | 0.47                               | Simple Median           | 1.088                      | 0.513                    | 0.034    |             |                 |                                     |                          |
| 302687                                                    | Albuminuria | Diastolic BP | 21                          | 0.47                               | Weighted Median         | 1.191                      | 0.498                    | 0.017    |             |                 |                                     |                          |
| 302687                                                    | Albuminuria | Diastolic BP | 21                          | 0.47                               | Egger Slope             | 0.950                      | 0.989                    | 0.337    |             |                 |                                     |                          |
| 302687                                                    | Albuminuria | Diastolic BP | 21                          | 0.47                               | Egger Intercept         | 0.002                      | 0.022                    | 0.940    |             |                 |                                     |                          |

BP, blood pressure

Directional MR Steiger filtering: filtered to SNPs with R<sup>2</sup> exposure > R<sup>2</sup> outcome

<sup>a</sup> Effects of SNPs on both albuminuria and blood pressure were measured in 302687 individuals in UK Biobank who had both albuminuria and blood pressure measurements and were not taking blood pressure medications

**Table S13. Power to Detect Significant Associations between Albuminuria Risk Score and Cardiometabolic Disease**

| <b>Disease</b>              | <b>Cases, UK<br/>Biobank</b> | <b>Controls, UK<br/>Biobank</b> | <b>Causal Effect<br/>(Odds Ratio)</b> | <b>R<sup>2</sup> variance<br/>explained by<br/>Albuminuria</b> | <b>Power to<br/>Detect</b> |
|-----------------------------|------------------------------|---------------------------------|---------------------------------------|----------------------------------------------------------------|----------------------------|
|                             |                              |                                 |                                       | <b>Risk Score in<br/>UK Biobank</b>                            |                            |
| All-Cause Mortality         | 11087                        | 371413                          | 1.1                                   | 0.007                                                          | <b>0.12</b>                |
|                             |                              |                                 | 1.2                                   | 0.007                                                          | <b>0.35</b>                |
| Coronary Artery Disease     | 32623                        | 349877                          | 1.1                                   | 0.007                                                          | <b>0.28</b>                |
|                             |                              |                                 | 1.15                                  | 0.007                                                          | <b>0.52</b>                |
| Stroke                      | 8818                         | 373682                          | 1.1                                   | 0.007                                                          | <b>0.11</b>                |
|                             |                              |                                 | 1.15                                  | 0.007                                                          | <b>0.19</b>                |
| Peripheral Vascular Disease | 4543                         | 377957                          | 1.2                                   | 0.007                                                          | <b>0.17</b>                |
|                             |                              |                                 | 1.3                                   | 0.007                                                          | <b>0.31</b>                |
| Heart Failure               | 5737                         | 376503                          | 1.1                                   | 0.007                                                          | <b>0.08</b>                |
|                             |                              |                                 | 1.2                                   | 0.007                                                          | <b>0.21</b>                |
|                             |                              |                                 | 1.3                                   | 0.007                                                          | <b>0.38</b>                |
|                             |                              |                                 | 1.4                                   | 0.007                                                          | <b>0.56</b>                |
| Type 2 Diabetes             | 17619                        | 364881                          | 1.2                                   | 0.007                                                          | <b>0.51</b>                |
| Chronic Kidney Disease      | 4885                         | 377615                          | 1.1                                   | 0.007                                                          | <b>0.08</b>                |
|                             |                              |                                 | 1.2                                   | 0.007                                                          | <b>0.18</b>                |
|                             |                              |                                 | 1.3                                   | 0.007                                                          | <b>0.33</b>                |
|                             |                              |                                 | 1.4                                   | 0.007                                                          | <b>0.5</b>                 |
|                             |                              |                                 | 1.5                                   | 0.007                                                          | <b>0.65</b>                |
| Hypertension                | 124345                       | 258155                          | 1.1                                   | 0.007                                                          | <b>0.64</b>                |
|                             |                              |                                 | 1.2                                   | 0.007                                                          | <b>0.99</b>                |

Causal effect values based on the range of observational or Mendelian randomization associations
